# Supplementary material for: Denitrification potential of the eastern oyster microbiome using a 16S rRNA gene based metabolic inference approach
Source: PLoS One. 2017 Sep 21;12(9):e0185071. doi: 10.1371/journal.pone.0185071 (PMC5608302; doi:10.1371/journal.pone.0185071)
Supplement: S1 Table — (CSV) [file pone.0185071.s004.csv]

# assembly_accession	organism_name	assembly_level
GCF_000010525.1	Azorhizobium caulinodans ORS 571 strain=ORS 571	Complete_ Genome
GCF_000007365.1	Buchnera aphidicola str. Sg (Schizaphis graminum) strain=Sg	Complete_ Genome
GCF_000007725.1	Buchnera aphidicola str. Bp (Baizongia pistaciae) strain=Bp (Baizongia pistaciae)	Complete_ Genome
GCF_000009605.1	Buchnera aphidicola str. APS (Acyrthosiphon pisum) strain=APS Tokyo1998	Complete_ Genome
GCF_000021065.1	Buchnera aphidicola str. Tuc7 (Acyrthosiphon pisum) strain=Tuc7	Complete_ Genome
GCF_000021085.1	Buchnera aphidicola str. 5A (Acyrthosiphon pisum) strain=5A	Complete_ Genome
GCF_000090965.1	Buchnera aphidicola BCc strain=BCc	Complete_ Genome
GCF_000183225.1	Buchnera aphidicola str. LL01 (Acyrthosiphon pisum) strain=LL01	Complete_ Genome
GCF_000183245.1	Buchnera aphidicola str. TLW03 (Acyrthosiphon pisum) strain=TLW03	Complete_ Genome
GCF_000183285.1	Buchnera aphidicola str. JF99 (Acyrthosiphon pisum) strain=JF99	Complete_ Genome
GCF_000183305.1	Buchnera aphidicola str. JF98 (Acyrthosiphon pisum) strain=JF98	Complete_ Genome
GCF_000217635.1	Buchnera aphidicola (Cinara tujafilina)	Complete_ Genome
GCF_000225445.1	Buchnera aphidicola str. Ak (Acyrthosiphon kondoi) strain=Ak	Complete_ Genome
GCF_000225465.1	Buchnera aphidicola str. Ua (Uroleucon ambrosiae) strain=Ua	Complete_ Genome
GCF_000521525.1	Buchnera aphidicola str. USDA (Myzus persicae) strain=USDA	Complete_ Genome
GCF_000521545.1	Buchnera aphidicola str. W106 (Myzus persicae) strain=W106	Complete_ Genome
GCF_000521565.1	Buchnera aphidicola str. G002 (Myzus persicae) strain=G002	Complete_ Genome
GCF_000521585.1	Buchnera aphidicola str. F009 (Myzus persicae) strain=F009	Complete_ Genome
GCF_001280225.1	Buchnera aphidicola (Aphis glycines) strain=BAg	Complete_ Genome
GCF_001648115.1	Buchnera aphidicola (Schlechtendalia chinensis) strain=SC	Complete_ Genome
GCF_001700895.1	Buchnera aphidicola (Diuraphis noxia) SAM	Complete_ Genome
GCF_900016785.1	Buchnera aphidicola (Tuberolachnus salignus) strain=BTs Pazieg	Complete_ Genome
GCF_900128595.1	Buchnera aphidicola (Cinara pseudotaxifoliae) strain=BCipseudotaxifoliae 3056	Complete_ Genome
GCF_900128725.1	Buchnera aphidicola strain=BCifornacula 2912	Complete_ Genome
GCF_900128735.1	Buchnera aphidicola (Cinara confinis) strain=BCiconfinis 2801	Complete_ Genome
GCF_000218545.1	Cellulomonas gilvus ATCC 13127 strain=ATCC 13127	Complete_ Genome
GCF_000020965.1	Dictyoglomus thermophilum H-6-12 strain=H-6-12; ATCC 35947	Complete_ Genome
GCF_000012885.1	Pelobacter carbinolicus DSM 2380 strain=DSM 2380	Complete_ Genome
GCF_000016585.1	Shewanella putrefaciens CN-32 strain=CN-32	Complete_ Genome
GCF_000169215.2	Shewanella putrefaciens 200 strain=200	Complete_ Genome
GCF_000219105.1	Myxococcus fulvus HW-1 strain=HW-1	Complete_ Genome
GCF_000988565.1	Myxococcus fulvus 124B02 strain=124B02	Complete_ Genome
GCF_000012685.1	Myxococcus xanthus DK 1622 strain=DK 1622	Complete_ Genome
GCF_000165485.1	Stigmatella aurantiaca DW4/3-1 strain=DW4/3-1	Complete_ Genome
GCF_001027285.1	Archangium gephyra strain=DSM 2261	Complete_ Genome
GCF_001189295.1	Chondromyces crocatus strain=Cm c5	Complete_ Genome
GCF_000067165.1	Sorangium cellulosum So ce56 strain=So ce 56	Complete_ Genome
GCF_000418325.1	Sorangium cellulosum So0157-2 strain=So0157-2	Complete_ Genome
GCF_000222485.1	Cyclobacterium marinum DSM 745 strain=DSM 745	Complete_ Genome
GCF_000218895.1	Runella slithyformis DSM 19594 strain=DSM 19594	Complete_ Genome
GCF_000165715.2	Rubinisphaera brasiliensis DSM 5305 strain=DSM 5305	Complete_ Genome
GCF_000092105.1	Planctopirus limnophila DSM 3776 strain=DSM 3776	Complete_ Genome
GCF_000025185.1	Pirellula staleyi DSM 6068 strain=DSM 6068	Complete_ Genome
GCF_000186345.1	Isosphaera pallida ATCC 43644 strain=ATCC 43644	Complete_ Genome
GCF_000008685.2	Borrelia burgdorferi B31 strain=B31	Complete_ Genome
GCF_000021405.1	Borrelia burgdorferi ZS7 strain=ZS7	Complete_ Genome
GCF_000166635.1	Borrelia burgdorferi N40 strain=N40	Complete_ Genome
GCF_000166655.1	Borrelia burgdorferi JD1 strain=JD1	Complete_ Genome
GCF_000444465.1	Borrelia burgdorferi CA382 strain=CA382	Complete_ Genome
GCF_000956315.1	Borrelia hermsii CC1 strain=CC1	Complete_ Genome
GCF_001660005.1	Borrelia hermsii HS1 strain=HS1 Browne Mountain	Complete_ Genome
GCF_000512145.1	Borrelia parkeri HR1 strain=HR1	Complete_ Genome
GCF_000012085.1	Borrelia turicatae 91E135 strain=9.10E+136	Complete_ Genome
GCF_001936255.1	Borrelia anserina Es strain=Es UTHSCSA	Complete_ Genome
GCF_000147075.1	Spirochaeta thermophila DSM 6192 strain=DSM 6192	Complete_ Genome
GCF_000184345.1	Spirochaeta thermophila DSM 6578 strain=DSM 6578	Complete_ Genome
GCF_000008185.1	Treponema denticola ATCC 35405 strain=ATCC 35405	Complete_ Genome
GCF_000022105.1	Brachyspira hyodysenteriae WA1 strain=WA1; ATCC 49526	Complete_ Genome
GCF_001676785.2	Brachyspira hyodysenteriae ATCC 27164 strain=B-78	Complete_ Genome
GCF_000008605.1	Treponema pallidum subsp. pallidum str. Nichols strain=Nichols	Complete_ Genome
GCF_000604125.1	Treponema pallidum subsp. pallidum str. Sea 81-4 strain=Sea 81-4	Complete_ Genome
GCF_000195275.1	Treponema succinifaciens DSM 2489 strain=DSM 2489	Complete_ Genome
GCF_000017605.1	Leptospira biflexa serovar Patoc strain 'Patoc 1 (Ames)' strain='Patoc 1 (Ames)	Complete_ Genome
GCF_000017685.1	Leptospira biflexa serovar Patoc strain 'Patoc 1 (Paris)' strain='Patoc 1 (Paris)	Complete_ Genome
GCF_000007685.1	Leptospira interrogans serovar Copenhageni str. Fiocruz L1-130 strain=Fiocruz L1-130	Complete_ Genome
GCF_000092565.1	Leptospira interrogans serovar Lai str. 56601 strain=56601	Complete_ Genome
GCF_000231175.1	Leptospira interrogans serovar Lai str. IPAV strain=IPAV	Complete_ Genome
GCF_000941035.1	Leptospira interrogans serovar Linhai str. 56609 strain=56609	Complete_ Genome
GCF_001010765.1	Leptospira interrogans serovar Bratislava strain=PigK151 AS 05 115	Complete_ Genome
GCF_001047635.1	Leptospira interrogans serovar Manilae strain=UP-MMC-NIID LP	Complete_ Genome
GCF_001047655.1	Leptospira interrogans serovar Manilae strain=UP-MMC-NIID HP	Complete_ Genome
GCF_001293065.1	Leptospira interrogans serovar Hardjo str. Norma strain=Norma Cattle	Complete_ Genome
GCF_000013945.1	Leptospira borgpetersenii serovar Hardjo-bovis str. L550 strain=L550	Complete_ Genome
GCF_000013965.1	Leptospira borgpetersenii serovar Hardjo-bovis str. JB197 strain=JB197	Complete_ Genome
GCF_001444465.1	Leptospira borgpetersenii serovar Ballum strain=56604	Complete_ Genome
GCF_000284315.1	Leptospirillum ferrooxidans C2-3 strain=C2-3	Complete_ Genome
GCF_000632475.1	Azospirillum brasilense strain=Az39	Complete_ Genome
GCF_001315015.1	Azospirillum brasilense strain=Sp 7	Complete_ Genome
GCF_000010725.1	Azospirillum sp. B510	Complete_ Genome
GCF_000283655.1	Azospirillum lipoferum 4B strain=4B	Complete_ Genome
GCF_000465235.1	Campylobacter coli CVM N29710 strain=CVM N29710	Complete_ Genome
GCF_000494775.1	Campylobacter coli 15-537360 strain=15-537360	Complete_ Genome
GCF_000583755.1	Campylobacter coli RM1875 strain=RM1875	Complete_ Genome
GCF_000583775.1	Campylobacter coli RM4661 strain=RM4661	Complete_ Genome
GCF_000583795.1	Campylobacter coli RM5611 strain=RM5611	Complete_ Genome
GCF_000954195.1	Campylobacter coli strain=FB1	Complete_ Genome
GCF_001305715.1	Campylobacter coli strain=BFR-CA-9557	Complete_ Genome
GCF_001417635.1	Campylobacter coli strain=HC2-48	Complete_ Genome
GCF_001483845.1	Campylobacter coli strain=OR12	Complete_ Genome
GCF_001639125.1	Campylobacter coli strain=YH501	Complete_ Genome
GCF_001717605.1	Campylobacter coli strain=14983A	Complete_ Genome
GCF_001865455.1	Campylobacter coli strain=YF2105	Complete_ Genome
GCF_001865475.1	Campylobacter coli strain=MG1116	Complete_ Genome
GCF_001865495.1	Campylobacter coli strain=BP3183	Complete_ Genome
GCF_001865515.1	Campylobacter coli strain=WA333	Complete_ Genome
GCF_001865535.1	Campylobacter coli strain=ZV1224	Complete_ Genome
GCF_001865555.1	Campylobacter coli strain=BG2108	Complete_ Genome
GCF_001936355.1	Campylobacter coli strain=YH502	Complete_ Genome
GCF_000015085.1	Campylobacter fetus subsp. fetus 82-40 strain=82-40	Complete_ Genome
GCF_000495505.1	Campylobacter fetus subsp. testudinum 03-427 strain=03-427	Complete_ Genome
GCF_000512745.2	Campylobacter fetus subsp. venerealis cfvi03/293 strain=cfvi03/293	Complete_ Genome
GCF_000759485.1	Campylobacter fetus subsp. fetus 04/554 strain=04/554	Complete_ Genome
GCF_000759515.1	Campylobacter fetus subsp. venerealis 97/608 strain=97/608	Complete_ Genome
GCF_000814265.1	Campylobacter fetus subsp. testudinum strain=pet-3 pet-3-1	Complete_ Genome
GCF_000967135.1	Campylobacter fetus subsp. venerealis str. 84-112 strain=84-112	Complete_ Genome
GCF_001484645.1	Campylobacter fetus subsp. testudinum Sp3 strain=SP3	Complete_ Genome
GCF_001686885.1	Campylobacter fetus subsp. venerealis strain=01/165	Complete_ Genome
GCF_000009085.1	Campylobacter jejuni subsp. jejuni NCTC 11168 = ATCC 700819 strain=NCTC 11168	Complete_ Genome
GCF_000011865.1	Campylobacter jejuni RM1221 strain=RM1221	Complete_ Genome
GCF_000015525.1	Campylobacter jejuni subsp. jejuni 81-176 strain=81-176	Complete_ Genome
GCF_000017485.1	Campylobacter jejuni subsp. doylei 269.97 strain=269.97	Complete_ Genome
GCF_000017905.1	Campylobacter jejuni subsp. jejuni 81116 strain=81116; NCTC 11828	Complete_ Genome
GCF_000025425.1	Campylobacter jejuni subsp. jejuni IA3902 IA3902	Complete_ Genome
GCF_000148705.1	Campylobacter jejuni subsp. jejuni M1 strain=M1	Complete_ Genome
GCF_000171795.2	Campylobacter jejuni subsp. jejuni CG8421 strain=CG8421	Complete_ Genome
GCF_000184205.1	Campylobacter jejuni subsp. jejuni S3 strain=S3	Complete_ Genome
GCF_000302555.5	Campylobacter jejuni subsp. jejuni PT14 strain=PT14	Complete_ Genome
GCF_000304375.1	Campylobacter jejuni subsp. jejuni NCTC 11168-BN148 strain=NCTC 11168-BN148	Complete_ Genome
GCF_000430385.1	Campylobacter jejuni 32488 strain=32488 NYCB-10-03-5511-C	Complete_ Genome
GCF_000466065.2	Campylobacter jejuni subsp. jejuni 00-2538 strain=00-2538	Complete_ Genome
GCF_000466075.2	Campylobacter jejuni subsp. jejuni 00-2544 strain=00-2544	Complete_ Genome
GCF_000466105.2	Campylobacter jejuni subsp. jejuni 00-2426 strain=00-2426	Complete_ Genome
GCF_000468915.2	Campylobacter jejuni subsp. jejuni 00-2425 strain=00-2425	Complete_ Genome
GCF_000493495.1	Campylobacter jejuni 4031 strain=4031	Complete_ Genome
GCF_000632435.1	Campylobacter jejuni subsp. jejuni R14 strain=R14	Complete_ Genome
GCF_000737085.1	Campylobacter jejuni subsp. jejuni strain=MTVDSCj20	Complete_ Genome
GCF_000772225.1	Campylobacter jejuni subsp. jejuni F38011 strain=F38011	Complete_ Genome
GCF_000807355.1	Campylobacter jejuni subsp. jejuni strain=YH001	Complete_ Genome
GCF_000830775.1	Campylobacter jejuni subsp. jejuni NCTC 11168-K12E5 strain=NCTC 11168-K12E5	Complete_ Genome
GCF_000830805.1	Campylobacter jejuni subsp. jejuni NCTC 11168-Kf1 strain=NCTC 11168-Kf1	Complete_ Genome
GCF_000830825.1	Campylobacter jejuni subsp. jejuni NCTC 11168-mcK12E5 strain=NCTC 11168-mcK12E5	Complete_ Genome
GCF_000830845.1	Campylobacter jejuni subsp. jejuni NCTC 11168-mfK12E5 strain=NCTC 11168-mfK12E5	Complete_ Genome
GCF_000830865.1	Campylobacter jejuni subsp. jejuni NCTC 11168-GSv strain=NCTC 11168-rNRC	Complete_ Genome
GCF_000835285.1	Campylobacter jejuni subsp. jejuni strain=00-1597	Complete_ Genome
GCF_000835305.1	Campylobacter jejuni subsp. jejuni strain=00-6200	Complete_ Genome
GCF_000835345.1	Campylobacter jejuni subsp. jejuni strain=01-1512	Complete_ Genome
GCF_000835365.1	Campylobacter jejuni subsp. jejuni strain=00-0949	Complete_ Genome
GCF_000934305.1	Campylobacter jejuni subsp. jejuni strain=35925	Complete_ Genome
GCF_001299565.1	Campylobacter jejuni subsp. jejuni strain=RM3197	Complete_ Genome
GCF_001299595.1	Campylobacter jejuni subsp. jejuni strain=RM3196	Complete_ Genome
GCF_001314285.1	Campylobacter jejuni strain=RM1285	Complete_ Genome
GCF_001412295.1	Campylobacter jejuni strain=CJM1cam	Complete_ Genome
GCF_001457695.1	Campylobacter jejuni strain=NCTC11351; NCTC11351	Complete_ Genome
GCF_001506185.1	Campylobacter jejuni strain=CJ677CC519	Complete_ Genome
GCF_001506205.1	Campylobacter jejuni strain=CJ677CC002	Complete_ Genome
GCF_001506225.1	Campylobacter jejuni strain=CJ677CC534	Complete_ Genome
GCF_001506245.1	Campylobacter jejuni strain=CJ677CC536	Complete_ Genome
GCF_001506265.1	Campylobacter jejuni strain=CJ677CC073	Complete_ Genome
GCF_001506285.1	Campylobacter jejuni strain=CJ677CC521	Complete_ Genome
GCF_001506305.1	Campylobacter jejuni strain=CJ677CC526	Complete_ Genome
GCF_001506345.1	Campylobacter jejuni strain=CJ677CC036	Complete_ Genome
GCF_001506365.1	Campylobacter jejuni strain=CJ677CC524	Complete_ Genome
GCF_001506385.1	Campylobacter jejuni strain=CJ677CC016	Complete_ Genome
GCF_001506405.1	Campylobacter jejuni strain=CJ677CC041	Complete_ Genome
GCF_001506425.1	Campylobacter jejuni strain=CJ677CC535	Complete_ Genome
GCF_001506445.1	Campylobacter jejuni strain=CJ677CC092	Complete_ Genome
GCF_001506465.1	Campylobacter jejuni strain=CJ677CC530	Complete_ Genome
GCF_001506485.1	Campylobacter jejuni strain=CJ677CC532	Complete_ Genome
GCF_001506505.1	Campylobacter jejuni strain=CJ677CC529	Complete_ Genome
GCF_001506525.1	Campylobacter jejuni strain=CJ677CC531	Complete_ Genome
GCF_001506545.1	Campylobacter jejuni strain=CJ677CC062	Complete_ Genome
GCF_001506565.1	Campylobacter jejuni strain=CJ677CC059	Complete_ Genome
GCF_001506585.1	Campylobacter jejuni strain=CJ677CC032	Complete_ Genome
GCF_001506605.1	Campylobacter jejuni strain=CJ677CC033	Complete_ Genome
GCF_001506625.1	Campylobacter jejuni strain=CJ677CC537	Complete_ Genome
GCF_001506645.1	Campylobacter jejuni strain=CJ677CC542	Complete_ Genome
GCF_001506665.1	Campylobacter jejuni strain=CJ677CC528	Complete_ Genome
GCF_001506685.1	Campylobacter jejuni strain=CJ677CC538	Complete_ Genome
GCF_001506705.1	Campylobacter jejuni strain=CJ677CC520	Complete_ Genome
GCF_001506725.1	Campylobacter jejuni strain=CJ677CC014	Complete_ Genome
GCF_001506745.1	Campylobacter jejuni strain=CJ677CC039	Complete_ Genome
GCF_001506765.1	Campylobacter jejuni strain=CJ677CC085	Complete_ Genome
GCF_001506785.1	Campylobacter jejuni strain=CJ677CC052	Complete_ Genome
GCF_001506805.1	Campylobacter jejuni strain=CJ677CC527	Complete_ Genome
GCF_001506825.1	Campylobacter jejuni strain=CJ677CC078	Complete_ Genome
GCF_001506845.1	Campylobacter jejuni strain=CJ677CC523	Complete_ Genome
GCF_001506865.1	Campylobacter jejuni strain=CJ677CC540	Complete_ Genome
GCF_001506885.1	Campylobacter jejuni strain=CJ677CC040	Complete_ Genome
GCF_001506905.1	Campylobacter jejuni strain=CJ677CC061	Complete_ Genome
GCF_001506925.1	Campylobacter jejuni strain=CJ677CC539	Complete_ Genome
GCF_001506945.1	Campylobacter jejuni strain=CJ677CC533	Complete_ Genome
GCF_001506965.1	Campylobacter jejuni strain=CJ677CC047	Complete_ Genome
GCF_001506985.1	Campylobacter jejuni strain=CJ677CC058	Complete_ Genome
GCF_001507005.1	Campylobacter jejuni strain=CJ677CC013	Complete_ Genome
GCF_001507025.1	Campylobacter jejuni strain=CJ677CC100	Complete_ Genome
GCF_001507045.1	Campylobacter jejuni strain=CJ677CC522	Complete_ Genome
GCF_001507065.1	Campylobacter jejuni strain=CJ677CC094	Complete_ Genome
GCF_001507085.1	Campylobacter jejuni strain=CJ677CC008	Complete_ Genome
GCF_001507105.1	Campylobacter jejuni strain=CJ677CC541	Complete_ Genome
GCF_001507125.1	Campylobacter jejuni strain=CJ677CC024	Complete_ Genome
GCF_001507145.1	Campylobacter jejuni strain=CJ677CC064	Complete_ Genome
GCF_001507165.1	Campylobacter jejuni strain=CJ677CC525	Complete_ Genome
GCF_001507185.1	Campylobacter jejuni strain=CJ677CC026	Complete_ Genome
GCF_001507205.1	Campylobacter jejuni strain=CJ677CC034	Complete_ Genome
GCF_001507225.1	Campylobacter jejuni strain=CJ677CC086	Complete_ Genome
GCF_001507245.1	Campylobacter jejuni strain=CJ677CC095	Complete_ Genome
GCF_001507265.1	Campylobacter jejuni strain=CJ677CC012	Complete_ Genome
GCF_001563565.1	Campylobacter jejuni strain=RM3194	Complete_ Genome
GCF_001587015.1	Campylobacter jejuni strain=OD267	Complete_ Genome
GCF_001587035.1	Campylobacter jejuni strain=WP2202	Complete_ Genome
GCF_001686905.1	Campylobacter jejuni subsp. jejuni strain=RM1285	Complete_ Genome
GCF_001717625.1	Campylobacter jejuni subsp. jejuni strain=14980A	Complete_ Genome
GCF_001721945.1	Campylobacter jejuni subsp. jejuni strain=MTVDSCj07	Complete_ Genome
GCF_001721965.1	Campylobacter jejuni subsp. jejuni strain=MTVDSCj13	Complete_ Genome
GCF_001721985.1	Campylobacter jejuni subsp. jejuni strain=MTVDSCj16	Complete_ Genome
GCF_001767215.1	Campylobacter jejuni subsp. jejuni str. RM3420 strain=RM3420	Complete_ Genome
GCF_001865395.1	Campylobacter jejuni strain=FJ3124	Complete_ Genome
GCF_001865415.1	Campylobacter jejuni strain=TS1218	Complete_ Genome
GCF_001865435.1	Campylobacter jejuni strain=IF1100	Complete_ Genome
GCF_001865595.1	Campylobacter jejuni subsp. jejuni M129 strain=M129	Complete_ Genome
GCF_001870085.1	Campylobacter jejuni strain=YQ2210	Complete_ Genome
GCF_001870105.1	Campylobacter jejuni strain=ZP3204	Complete_ Genome
GCF_001951235.1	Campylobacter jejuni strain=HF5-4A-4	Complete_ Genome
GCF_001951255.1	Campylobacter jejuni strain=HF5-5-1	Complete_ Genome
GCF_001951275.1	Campylobacter jejuni strain=HF5-7-1	Complete_ Genome
GCF_001951295.1	Campylobacter jejuni strain=NS4-1-1	Complete_ Genome
GCF_001951315.1	Campylobacter jejuni strain=NS4-5-1	Complete_ Genome
GCF_001951335.1	Campylobacter jejuni strain=NS4-9-1	Complete_ Genome
GCF_001643955.1	Campylobacter hyointestinalis subsp. hyointestinalis LMG 9260 strain=LMG 9260	Complete_ Genome
GCF_001643975.1	Campylobacter hyointestinalis subsp. lawsonii strain=LMG 15993	Complete_ Genome
GCF_000017725.2	Campylobacter concisus 13826 strain=13826	Complete_ Genome
GCF_001298465.1	Campylobacter concisus strain=ATCC 33237	Complete_ Genome
GCF_000017465.2	Campylobacter curvus 525.92 strain=525.92	Complete_ Genome
GCF_000019205.1	Campylobacter lari RM2100 strain=RM2100; ATCC BAA-1060D	Complete_ Genome
GCF_000816225.1	Campylobacter lari subsp. concheus LMG 11760 strain=LMG 11760	Complete_ Genome
GCF_000816365.1	Campylobacter lari NCTC 11845 strain=NCTC 11845	Complete_ Genome
GCF_000816385.2	Campylobacter lari CCUG 22395 strain=CCUG 22395	Complete_ Genome
GCF_000816405.1	Campylobacter lari RM16701 strain=RM16701	Complete_ Genome
GCF_000816425.1	Campylobacter lari RM16712 strain=RM16712	Complete_ Genome
GCF_001017575.1	Campylobacter lari strain=Slaughter Beach	Complete_ Genome
GCF_000008525.1	Helicobacter pylori 26695 strain=26695	Complete_ Genome
GCF_000008785.1	Helicobacter pylori J99 strain=J99	Complete_ Genome
GCF_000011725.1	Helicobacter pylori 51 strain=51	Complete_ Genome
GCF_000013245.1	Helicobacter pylori HPAG1 strain=HPAG1	Complete_ Genome
GCF_000020245.1	Helicobacter pylori Shi470 strain=Shi470	Complete_ Genome
GCF_000021165.1	Helicobacter pylori G27 strain=G27	Complete_ Genome
GCF_000021465.1	Helicobacter pylori P12 strain=P12	Complete_ Genome
GCF_000023805.1	Helicobacter pylori 52 strain=52	Complete_ Genome
GCF_000091345.1	Helicobacter pylori B38 strain=B38	Complete_ Genome
GCF_000093185.1	Helicobacter pylori v225d strain=v225d	Complete_ Genome
GCF_000148665.1	Helicobacter pylori 908 strain=908	Complete_ Genome
GCF_000148855.1	Helicobacter pylori SJM180 strain=SJM180	Complete_ Genome
GCF_000148875.1	Helicobacter pylori PeCan4 strain=PeCan4	Complete_ Genome
GCF_000148895.1	Helicobacter pylori Cuz20 strain=Cuz20	Complete_ Genome
GCF_000148915.1	Helicobacter pylori Sat464 strain=Sat464	Complete_ Genome
GCF_000178935.2	Helicobacter pylori 35A strain=35A	Complete_ Genome
GCF_000185185.1	Helicobacter pylori India7 strain=India7	Complete_ Genome
GCF_000185205.1	Helicobacter pylori Gambia94/24 strain=Gambia94/24	Complete_ Genome
GCF_000185225.1	Helicobacter pylori Lithuania75 strain=Lithuania75	Complete_ Genome
GCF_000185245.1	Helicobacter pylori SouthAfrica7 strain=SouthAfrica7	Complete_ Genome
GCF_000192315.1	Helicobacter pylori 2017 strain=2017	Complete_ Genome
GCF_000192335.1	Helicobacter pylori 2018 strain=2018	Complete_ Genome
GCF_000196755.1	Helicobacter pylori B8 strain=B8	Complete_ Genome
GCF_000213135.1	Helicobacter pylori 83 strain=83	Complete_ Genome
GCF_000224535.1	Helicobacter pylori Puno120 strain=Puno120	Complete_ Genome
GCF_000224555.1	Helicobacter pylori Puno135 strain=Puno135	Complete_ Genome
GCF_000224575.1	Helicobacter pylori SNT49 strain=Santal49	Complete_ Genome
GCF_000255955.1	Helicobacter pylori ELS37 strain=ELS37	Complete_ Genome
GCF_000259235.1	Helicobacter pylori HUP-B14 strain=HUP-B14	Complete_ Genome
GCF_000262655.1	Helicobacter pylori XZ274 strain=XZ274	Complete_ Genome
GCF_000270005.1	Helicobacter pylori F16	Complete_ Genome
GCF_000270025.1	Helicobacter pylori F30	Complete_ Genome
GCF_000270045.1	Helicobacter pylori F32	Complete_ Genome
GCF_000270065.1	Helicobacter pylori F57	Complete_ Genome
GCF_000277365.1	Helicobacter pylori Shi417 strain=Shi417	Complete_ Genome
GCF_000277385.1	Helicobacter pylori Shi169 strain=Shi169	Complete_ Genome
GCF_000277405.1	Helicobacter pylori Shi112 strain=Shi112	Complete_ Genome
GCF_000277425.1	Helicobacter pylori PeCan18 strain=PeCan18	Complete_ Genome
GCF_000307795.1	Helicobacter pylori 26695 strain=26695	Complete_ Genome
GCF_000307815.1	Helicobacter pylori Rif1 strain=Rif1	Complete_ Genome
GCF_000307835.1	Helicobacter pylori Rif2 strain=Rif2	Complete_ Genome
GCF_000315955.1	Helicobacter pylori Aklavik117 strain=Aklavik117	Complete_ Genome
GCF_000317875.1	Helicobacter pylori Aklavik86 strain=Aklavik86	Complete_ Genome
GCF_000348865.1	Helicobacter pylori OK113 strain=OK113	Complete_ Genome
GCF_000348885.1	Helicobacter pylori OK310 strain=OK310	Complete_ Genome
GCF_000392455.3	Helicobacter pylori UM032 strain=UM032	Complete_ Genome
GCF_000392475.3	Helicobacter pylori UM299 strain=299	Complete_ Genome
GCF_000392515.3	Helicobacter pylori UM037 strain=UM037	Complete_ Genome
GCF_000392535.3	Helicobacter pylori UM066 strain=UM066	Complete_ Genome
GCF_000439295.2	Helicobacter pylori UM298 strain=UM298	Complete_ Genome
GCF_000498315.1	Helicobacter pylori BM012A strain=BM012A	Complete_ Genome
GCF_000498335.1	Helicobacter pylori BM012S strain=BM012S	Complete_ Genome
GCF_000590775.1	Helicobacter pylori SouthAfrica20 strain=SouthAfrica20	Complete_ Genome
GCF_000600045.1	Helicobacter pylori oki102 strain=oki102	Complete_ Genome
GCF_000600085.1	Helicobacter pylori oki112 strain=oki112	Complete_ Genome
GCF_000600125.1	Helicobacter pylori oki128 strain=oki128	Complete_ Genome
GCF_000600145.1	Helicobacter pylori oki154 strain=oki154	Complete_ Genome
GCF_000600165.1	Helicobacter pylori oki422 strain=oki422	Complete_ Genome
GCF_000600185.1	Helicobacter pylori oki673 strain=oki673	Complete_ Genome
GCF_000600205.1	Helicobacter pylori oki828 strain=oki828	Complete_ Genome
GCF_000600225.1	Helicobacter pylori oki898 strain=oki898	Complete_ Genome
GCF_000685625.1	Helicobacter pylori J166 strain=J166	Complete_ Genome
GCF_000685665.1	Helicobacter pylori strain=BM013A	Complete_ Genome
GCF_000685705.1	Helicobacter pylori strain=BM012B	Complete_ Genome
GCF_000685745.1	Helicobacter pylori strain=BM013B	Complete_ Genome
GCF_000817025.1	Helicobacter pylori strain=Hp238	Complete_ Genome
GCF_000826985.1	Helicobacter pylori 26695-1 strain=26695-1	Complete_ Genome
GCF_000827025.1	Helicobacter pylori strain=26695-1MET	Complete_ Genome
GCF_000828955.1	Helicobacter pylori NY40 strain=NY40	Complete_ Genome
GCF_000829095.1	Helicobacter pylori 26695-1 strain=26695-1	Complete_ Genome
GCF_000829115.1	Helicobacter pylori 26695-1CL strain=26695-1CL	Complete_ Genome
GCF_000829135.1	Helicobacter pylori 26695-1CH strain=26695-1CH	Complete_ Genome
GCF_000982695.1	Helicobacter pylori J99 strain=J99	Complete_ Genome
GCF_001433495.1	Helicobacter pylori strain=29CaP	Complete_ Genome
GCF_001433515.1	Helicobacter pylori strain=7C	Complete_ Genome
GCF_001549715.1	Helicobacter pylori strain=ML1	Complete_ Genome
GCF_001549875.1	Helicobacter pylori strain=ML3	Complete_ Genome
GCF_001653375.1	Helicobacter pylori strain=L7	Complete_ Genome
GCF_001653395.1	Helicobacter pylori strain=DU15	Complete_ Genome
GCF_001653415.1	Helicobacter pylori strain=CC33C	Complete_ Genome
GCF_001653435.1	Helicobacter pylori strain=ausabrJ05	Complete_ Genome
GCF_001653455.1	Helicobacter pylori strain=K26A1	Complete_ Genome
GCF_001653475.1	Helicobacter pylori strain=PNG84A	Complete_ Genome
GCF_001991095.1	Helicobacter pylori PMSS1 strain=PMSS1	Complete_ Genome
GCF_000009305.1	Helicobacter acinonychis str. Sheeba strain=Sheeba	Complete_ Genome
GCF_000284635.1	Helicobacter cinaedi PAGU611 strain=PAGU611	Complete_ Genome
GCF_000349975.1	Helicobacter cinaedi CCUG 18818 = ATCC BAA-847 strain=ATCC BAA-847	Complete_ Genome
GCF_000200595.1	Helicobacter felis ATCC 49179 strain=ATCC 49179	Complete_ Genome
GCF_000091985.1	Helicobacter mustelae 12198 strain=12198	Complete_ Genome
GCF_000026085.1	Pseudoalteromonas haloplanktis TAC125 strain=TAC125	Complete_ Genome
GCF_000008145.1	Brucella abortus bv. 1 str. 9-941 strain=9-941	Complete_ Genome
GCF_000018725.1	Brucella abortus S19 strain=S19	Complete_ Genome
GCF_000054005.1	Brucella abortus 2308 strain=2308	Complete_ Genome
GCF_000238175.1	Brucella abortus A13334 strain=A13334	Complete_ Genome
GCF_000740135.1	Brucella abortus strain=BDW	Complete_ Genome
GCF_000740155.1	Brucella abortus strain=BER	Complete_ Genome
GCF_000740175.1	Brucella abortus strain=NCTC 10505	Complete_ Genome
GCF_000740195.1	Brucella abortus bv. 9 str. C68 strain=C68	Complete_ Genome
GCF_000740215.1	Brucella abortus bv. 6 str. 870 strain=870	Complete_ Genome
GCF_000740295.1	Brucella abortus strain=63 75	Complete_ Genome
GCF_000740315.1	Brucella abortus strain=BFY	Complete_ Genome
GCF_000740375.1	Brucella abortus bv. 2 str. 86/8/59 strain=86/8/59	Complete_ Genome
GCF_001043295.1	Brucella abortus strain=BAB8416 Bab8416	Complete_ Genome
GCF_001296965.1	Brucella abortus 104M strain=104M	Complete_ Genome
GCF_000016845.1	Brucella ovis ATCC 25840 strain=ATCC 25840	Complete_ Genome
GCF_000008985.1	Francisella tularensis subsp. tularensis SCHU S4 strain=SCHU S4	Complete_ Genome
GCF_000009245.1	Francisella tularensis subsp. holarctica LVS strain=LVS	Complete_ Genome
GCF_000009325.1	Francisella tularensis subsp. tularensis FSC198 strain=FSC 198	Complete_ Genome
GCF_000011405.1	Francisella tularensis subsp. holarctica OSU18 strain=OSU18	Complete_ Genome
GCF_000014605.1	Francisella tularensis subsp. holarctica OSU18 strain=OSU18	Complete_ Genome
GCF_000014645.1	Francisella tularensis subsp. novicida U112 strain=U112	Complete_ Genome
GCF_000016105.1	Francisella tularensis subsp. tularensis WY96-3418 strain=WY96-3418	Complete_ Genome
GCF_000017785.1	Francisella tularensis subsp. holarctica FTNF002-00 strain=FTNF002-00	Complete_ Genome
GCF_000018925.1	Francisella tularensis subsp. mediasiatica FSC147 strain=FSC147; GIEM 543	Complete_ Genome
GCF_000023305.1	Francisella tularensis subsp. tularensis NE061598 strain=NE061598	Complete_ Genome
GCF_000168775.2	Francisella tularensis subsp. holarctica FSC200 strain=FSC200	Complete_ Genome
GCF_000195535.1	Francisella cf. novicida Fx1 strain=Fx1	Complete_ Genome
GCF_000195555.1	Francisella cf. tularensis subsp. novicida 3523 strain=3523	Complete_ Genome
GCF_000248415.1	Francisella tularensis subsp. tularensis TIGB03 strain=TIGB03	Complete_ Genome
GCF_000248435.1	Francisella tularensis subsp. tularensis TI0902 strain=TI0902	Complete_ Genome
GCF_000313385.1	Francisella tularensis subsp. holarctica F92 strain=F92	Complete_ Genome
GCF_000524575.1	Francisella tularensis subsp. holarctica PHIT-FT049 strain=PHIT-FT049	Complete_ Genome
GCF_000833165.1	Francisella tularensis subsp. novicida F6168 strain=F6168	Complete_ Genome
GCF_000833235.1	Francisella tularensis subsp. holarctica strain=FTT_1	Complete_ Genome
GCF_000833335.1	Francisella tularensis subsp. holarctica LVS strain=LVS	Complete_ Genome
GCF_000833355.1	Francisella tularensis subsp. novicida D9876 strain=D9876	Complete_ Genome
GCF_000833375.1	Francisella tularensis subsp. novicida U112 strain=U112	Complete_ Genome
GCF_000833475.1	Francisella tularensis subsp. tularensis strain=NIH B-38	Complete_ Genome
GCF_000833495.1	Francisella tularensis subsp. holarctica strain=VT68	Complete_ Genome
GCF_000833515.1	Francisella tularensis subsp. holarctica strain=425	Complete_ Genome
GCF_000833535.1	Francisella tularensis subsp. tularensis SCHU S4 strain=SHU-S4	Complete_ Genome
GCF_000834965.1	Francisella tularensis subsp. tularensis strain=DPG 3A-IS	Complete_ Genome
GCF_000978785.2	Francisella tularensis subsp. tularensis str. SCHU S4 substr. NR-28534 strain=SCHU S4 substr. NR-28534	Complete_ Genome
GCF_001011135.1	Francisella tularensis subsp. tularensis WY-00W4114 strain=WY-00W4114 Francisella tularensis subsp. tularensis subtype A.II	Complete_ Genome
GCF_001262115.1	Francisella tularensis subsp. tularensis strain=WY96	Complete_ Genome
GCF_001267475.1	Francisella tularensis subsp. tularensis MA00-2987 strain=MA00-2987	Complete_ Genome
GCF_001729565.1	Francisella tularensis subsp. tularensis strain=NR-21736	Complete_ Genome
GCF_001729585.1	Francisella tularensis subsp. tularensis strain=NR-21737	Complete_ Genome
GCF_001729605.1	Francisella tularensis subsp. tularensis strain=NR-21734	Complete_ Genome
GCF_001865695.1	Francisella tularensis subsp. novicida PA10-7858 strain=PA10-7858	Complete_ Genome
GCF_001880205.1	Francisella tularensis subsp. novicida strain=AL97-2214	Complete_ Genome
GCF_001880245.1	Francisella tularensis subsp. novicida strain=AZ06-7470	Complete_ Genome
GCF_000203895.1	Paracoccus denitrificans PD1222 strain=PD1222	Complete_ Genome
GCF_001399775.1	Thermus aquaticus Y51MC23 strain=Y51MC23	Complete_ Genome
GCF_000008125.1	Thermus thermophilus HB27 strain=HB27	Complete_ Genome
GCF_000091545.1	Thermus thermophilus HB8 strain=HB8	Complete_ Genome
GCF_000214845.1	Thermus thermophilus SG0.5JP17-16 strain=SG0.5JP17-16	Complete_ Genome
GCF_000258245.1	Thermus thermophilus JL-18 strain=JL-18	Complete_ Genome
GCF_000024425.1	Meiothermus ruber DSM 1279 strain=DSM 1279	Complete_ Genome
GCF_000017645.1	Xanthobacter autotrophicus Py2 strain=Py2	Complete_ Genome
GCF_000093145.3	Comamonas testosteroni CNB-2 strain=CNB-1 substr. CNB-2	Complete_ Genome
GCF_000739375.1	Comamonas testosteroni TK102 strain=TK102	Complete_ Genome
GCF_001406795.1	Comamonas testosteroni P19 C19	Complete_ Genome
GCF_000006765.1	Pseudomonas aeruginosa PAO1 strain=PAO1	Complete_ Genome
GCF_000014625.1	Pseudomonas aeruginosa UCBPP-PA14 strain=UCBPP-PA14	Complete_ Genome
GCF_000017205.1	Pseudomonas aeruginosa PA7 strain=PA7	Complete_ Genome
GCF_000026645.1	Pseudomonas aeruginosa LESB58	Complete_ Genome
GCF_000220025.2	Pseudomonas aeruginosa AES-1R strain=AES-1R	Complete_ Genome
GCF_000226155.1	Pseudomonas aeruginosa M18 strain=M18	Complete_ Genome
GCF_000271365.1	Pseudomonas aeruginosa DK2 strain=DK2	Complete_ Genome
GCF_000271985.2	Pseudomonas aeruginosa SJTD-1 strain=SJTD-1	Complete_ Genome
GCF_000284555.1	Pseudomonas aeruginosa NCGM2.S1 strain=NCGM2.S1	Complete_ Genome
GCF_000359505.1	Pseudomonas aeruginosa B136-33 strain=B136-33	Complete_ Genome
GCF_000414035.1	Pseudomonas aeruginosa RP73 strain=RP73	Complete_ Genome
GCF_000473745.2	Pseudomonas aeruginosa VRFPA04 strain=VRFPA04	Complete_ Genome
GCF_000496455.2	Pseudomonas aeruginosa DHS01 strain=DH01	Complete_ Genome
GCF_000496605.2	Pseudomonas aeruginosa PA1 strain=PA1	Complete_ Genome
GCF_000496645.1	Pseudomonas aeruginosa PA1R strain=PA1R	Complete_ Genome
GCF_000504045.1	Pseudomonas aeruginosa MTB-1 strain=MTB-1	Complete_ Genome
GCF_000508765.1	Pseudomonas aeruginosa LES431 strain=LES431	Complete_ Genome
GCF_000510305.1	Pseudomonas aeruginosa SCV20265 strain=SCV20265	Complete_ Genome
GCF_000524595.1	Pseudomonas aeruginosa YL84 strain=YL84	Complete_ Genome
GCF_000816985.1	Pseudomonas aeruginosa strain=F22031	Complete_ Genome
GCF_000829255.1	Pseudomonas aeruginosa strain=NCGM1984	Complete_ Genome
GCF_000829275.1	Pseudomonas aeruginosa strain=NCGM1900	Complete_ Genome
GCF_000829885.1	Pseudomonas aeruginosa strain=FRD1	Complete_ Genome
GCF_000981825.1	Pseudomonas aeruginosa strain=Carb01 63	Complete_ Genome
GCF_001045685.1	Pseudomonas aeruginosa DSM 50071 strain=DSM 50071	Complete_ Genome
GCF_001077475.1	Pseudomonas aeruginosa strain=F9676	Complete_ Genome
GCF_001293085.1	Pseudomonas aeruginosa strain=PA1RG	Complete_ Genome
GCF_001447845.1	Pseudomonas aeruginosa strain=VA-134	Complete_ Genome
GCF_001457615.1	Pseudomonas aeruginosa strain=NCTC10332; NCTC10332	Complete_ Genome
GCF_001482325.1	Pseudomonas aeruginosa strain=12-4-4(59)	Complete_ Genome
GCF_001515845.1	Pseudomonas aeruginosa S86968	Complete_ Genome
GCF_001515915.1	Pseudomonas aeruginosa T38079	Complete_ Genome
GCF_001516005.1	Pseudomonas aeruginosa T52373	Complete_ Genome
GCF_001516105.1	Pseudomonas aeruginosa T63266	Complete_ Genome
GCF_001516165.1	Pseudomonas aeruginosa W16407	Complete_ Genome
GCF_001516185.1	Pseudomonas aeruginosa W36662	Complete_ Genome
GCF_001516205.1	Pseudomonas aeruginosa W45909	Complete_ Genome
GCF_001516225.1	Pseudomonas aeruginosa W60856	Complete_ Genome
GCF_001516245.1	Pseudomonas aeruginosa F23197	Complete_ Genome
GCF_001516265.1	Pseudomonas aeruginosa F30658	Complete_ Genome
GCF_001516305.1	Pseudomonas aeruginosa H5708	Complete_ Genome
GCF_001516325.1	Pseudomonas aeruginosa H27930	Complete_ Genome
GCF_001516345.1	Pseudomonas aeruginosa H47921	Complete_ Genome
GCF_001516365.1	Pseudomonas aeruginosa M1608	Complete_ Genome
GCF_001516385.1	Pseudomonas aeruginosa M37351	Complete_ Genome
GCF_001518975.1	Pseudomonas aeruginosa strain=USDA-ARS-USMARC-41639	Complete_ Genome
GCF_001542795.1	Pseudomonas aeruginosa X78812	Complete_ Genome
GCF_001542835.1	Pseudomonas aeruginosa F9670	Complete_ Genome
GCF_001547955.1	Pseudomonas aeruginosa strain=NCGM257	Complete_ Genome
GCF_001548135.1	Pseudomonas aeruginosa strain=8380	Complete_ Genome
GCF_001548335.1	Pseudomonas aeruginosa strain=IOMTU 133	Complete_ Genome
GCF_001594325.1	Pseudomonas aeruginosa F63912	Complete_ Genome
GCF_001606045.1	Pseudomonas aeruginosa strain=N17-1	Complete_ Genome
GCF_001618925.1	Pseudomonas aeruginosa strain=ATCC 27853	Complete_ Genome
GCF_001632245.1	Pseudomonas aeruginosa strain=BAMC 07-48	Complete_ Genome
GCF_001679685.1	Pseudomonas aeruginosa strain=PA121617	Complete_ Genome
GCF_001721745.1	Pseudomonas aeruginosa strain=PA_D1	Complete_ Genome
GCF_001721765.1	Pseudomonas aeruginosa strain=PA_D2	Complete_ Genome
GCF_001721785.1	Pseudomonas aeruginosa strain=PA_D9	Complete_ Genome
GCF_001721805.1	Pseudomonas aeruginosa strain=PA_D16	Complete_ Genome
GCF_001721825.1	Pseudomonas aeruginosa strain=PA_D22	Complete_ Genome
GCF_001721845.1	Pseudomonas aeruginosa strain=PA_D25	Complete_ Genome
GCF_001722005.2	Pseudomonas aeruginosa strain=DN1	Complete_ Genome
GCF_001722025.1	Pseudomonas aeruginosa strain=PA_D5	Complete_ Genome
GCF_001722045.1	Pseudomonas aeruginosa strain=PA_D21	Complete_ Genome
GCF_001729505.1	Pseudomonas aeruginosa strain=ATCC 15692	Complete_ Genome
GCF_001750705.1	Pseudomonas aeruginosa strain=FA-HZ1	Complete_ Genome
GCF_001792835.1	Pseudomonas aeruginosa strain=PA1088	Complete_ Genome
GCF_001792855.1	Pseudomonas aeruginosa strain=PA8281	Complete_ Genome
GCF_001792875.1	Pseudomonas aeruginosa strain=PA11803	Complete_ Genome
GCF_001870265.1	Pseudomonas aeruginosa strain=PA7790	Complete_ Genome
GCF_001874465.1	Pseudomonas aeruginosa B10W	Complete_ Genome
GCF_001879525.1	Pseudomonas aeruginosa strain=PAER4_119	Complete_ Genome
GCF_001900195.1	Pseudomonas aeruginosa strain=SCVFeb	Complete_ Genome
GCF_001900225.1	Pseudomonas aeruginosa strain=SCVJan	Complete_ Genome
GCF_001900265.1	Pseudomonas aeruginosa strain=NHmuc	Complete_ Genome
GCF_900070375.1	Pseudomonas aeruginosa strain=PAO1_Orsay	Complete_ Genome
GCF_900095805.1	Pseudomonas aeruginosa PA14Or_reads	Complete_ Genome
GCF_900149285.1	Pseudomonas aeruginosa PcyII-10	Complete_ Genome
GCF_000014225.1	Pseudoalteromonas atlantica T6c strain=T6c	Complete_ Genome
GCF_000292915.1	Burkholderia cepacia GG4 strain=GG4	Complete_ Genome
GCF_000701165.1	Burkholderia cepacia JBK9 strain=JBK9	Complete_ Genome
GCF_000755805.1	Burkholderia cepacia strain=DDS 7H-2	Complete_ Genome
GCF_000974835.2	Burkholderia cepacia strain=LO6	Complete_ Genome
GCF_001411495.1	Burkholderia cepacia ATCC 25416 strain=UCB 717	Complete_ Genome
GCF_001718395.1	Burkholderia cepacia strain=INT3-BP177	Complete_ Genome
GCF_001718835.1	Burkholderia cepacia strain=MSMB1184WGS	Complete_ Genome
GCF_000009225.2	Pseudomonas fluorescens SBW25 strain=SBW25	Complete_ Genome
GCF_000012445.1	Pseudomonas fluorescens Pf0-1 strain=Pf0-1	Complete_ Genome
GCF_000237065.1	Pseudomonas fluorescens F113 strain=F113	Complete_ Genome
GCF_000262325.2	Pseudomonas fluorescens A506 strain=A506	Complete_ Genome
GCF_000293885.2	Pseudomonas fluorescens NCIMB 11764 strain=NCIMB 11764	Complete_ Genome
GCF_000730425.1	Pseudomonas fluorescens strain=UK4	Complete_ Genome
GCF_000934565.1	Pseudomonas fluorescens strain=PCL1751	Complete_ Genome
GCF_000963495.1	Pseudomonas fluorescens PICF7 strain=PICF7	Complete_ Genome
GCF_000968415.1	Pseudomonas fluorescens strain=LBUM223	Complete_ Genome
GCF_001307155.1	Pseudomonas fluorescens strain=FW300-N2E3	Complete_ Genome
GCF_001307275.1	Pseudomonas fluorescens strain=FW300-N2C3	Complete_ Genome
GCF_001612705.1	Pseudomonas fluorescens strain=LBUM636	Complete_ Genome
GCF_001708445.1	Pseudomonas fluorescens strain=L321	Complete_ Genome
GCF_001708465.1	Pseudomonas fluorescens strain=L111	Complete_ Genome
GCF_001708485.1	Pseudomonas fluorescens strain=L228	Complete_ Genome
GCF_001747385.1	Pseudomonas fluorescens strain=Pt14	Complete_ Genome
GCF_001543265.1	Pseudomonas fragi strain=P121	Complete_ Genome
GCF_000016565.1	Pseudomonas mendocina ymp strain=ymp	Complete_ Genome
GCF_000204295.1	Pseudomonas mendocina NK-01 strain=NK-01	Complete_ Genome
GCF_000733715.2	Pseudomonas mendocina S5.2 strain=S5.2	Complete_ Genome
GCF_000007565.2	Pseudomonas putida KT2440 strain=KT2440	Complete_ Genome
GCF_000016865.1	Pseudomonas putida F1 strain=F1	Complete_ Genome
GCF_000019125.1	Pseudomonas putida GB-1 strain=GB-1	Complete_ Genome
GCF_000019445.1	Pseudomonas putida W619 strain=W619	Complete_ Genome
GCF_000183645.1	Pseudomonas putida BIRD-1 strain=BIRD-1	Complete_ Genome
GCF_000219705.1	Pseudomonas putida S16 strain=S16	Complete_ Genome
GCF_000226035.2	Pseudomonas putida B6-2 strain=B6-2	Complete_ Genome
GCF_000264665.1	Pseudomonas putida ND6 strain=ND6	Complete_ Genome
GCF_000271965.2	Pseudomonas putida SJTE-1 strain=SJTE-1	Complete_ Genome
GCF_000325725.1	Pseudomonas putida HB3267 strain=PC9	Complete_ Genome
GCF_000410575.1	Pseudomonas putida H8234 strain=H8234	Complete_ Genome
GCF_000412675.1	Pseudomonas putida NBRC 14164 strain=NBRC 14164	Complete_ Genome
GCF_000495455.2	Pseudomonas putida S12 strain=S12	Complete_ Genome
GCF_000498395.2	Pseudomonas putida S13.1.2 strain=S13.1.2	Complete_ Genome
GCF_000691565.1	Pseudomonas putida strain=DLL-E4	Complete_ Genome
GCF_001515585.1	Pseudomonas putida strain=1A00316	Complete_ Genome
GCF_001636055.1	Pseudomonas putida strain=PC2	Complete_ Genome
GCF_001767335.1	Pseudomonas putida JB strain=JB	Complete_ Genome
GCF_001886975.1	Pseudomonas putida strain=PP112420	Complete_ Genome
GCF_000009125.1	Ralstonia solanacearum GMI1000 strain=GMI1000	Complete_ Genome
GCF_000215325.1	Ralstonia solanacearum Po82 strain=Po82	Complete_ Genome
GCF_000283475.1	Ralstonia solanacearum PSI07 strain=PSI07	Complete_ Genome
GCF_001299555.1	Ralstonia solanacearum strain=UY031	Complete_ Genome
GCF_001586135.1	Ralstonia solanacearum strain=KACC 10722	Complete_ Genome
GCF_001587135.1	Ralstonia solanacearum strain=UW163	Complete_ Genome
GCF_001587155.1	Ralstonia solanacearum strain=IBSBF1503	Complete_ Genome
GCF_001663415.1	Ralstonia solanacearum strain=YC40-M	Complete_ Genome
GCF_001708525.1	Ralstonia solanacearum strain=KACC10709	Complete_ Genome
GCF_001879565.1	Ralstonia solanacearum OE1-1 strain=OE1-1	Complete_ Genome
GCF_001887535.1	Ralstonia solanacearum FJAT-1458 strain=FJAT-1458	Complete_ Genome
GCF_001891105.1	Ralstonia solanacearum strain=EP1	Complete_ Genome
GCF_000013785.1	Pseudomonas stutzeri A1501 strain=A1501	Complete_ Genome
GCF_000195105.1	Pseudomonas stutzeri DSM 4166 strain=DSM 4166	Complete_ Genome
GCF_000219605.1	Pseudomonas stutzeri strain=CGMCC 1.1803	Complete_ Genome
GCF_000267545.1	Pseudomonas stutzeri CCUG 29243 strain=CCUG 29243	Complete_ Genome
GCF_000279165.1	Pseudomonas stutzeri DSM 10701 strain=DSM 10701	Complete_ Genome
GCF_000327065.1	Pseudomonas stutzeri RCH2 strain=RCH2	Complete_ Genome
GCF_000590475.1	Pseudomonas stutzeri strain=28a24	Complete_ Genome
GCF_000661915.1	Pseudomonas stutzeri strain=19SMN4	Complete_ Genome
GCF_001038645.1	Pseudomonas stutzeri strain=SLG510A3-8	Complete_ Genome
GCF_001648195.1	Pseudomonas stutzeri strain=273	Complete_ Genome
GCF_000012245.1	Pseudomonas syringae pv. syringae B728a strain=B728a	Complete_ Genome
GCF_000344335.2	Pseudomonas syringae pv. actinidiae ICMP 9853 strain=ICMP 9853	Complete_ Genome
GCF_000344355.2	Pseudomonas syringae pv. actinidiae ICMP 18708 strain=ICMP 18708	Complete_ Genome
GCF_000452705.1	Pseudomonas syringae CC1557 strain=CC1557	Complete_ Genome
GCF_000648735.3	Pseudomonas syringae pv. actinidiae ICMP 18884 strain=ICMP 18884	Complete_ Genome
GCF_000988395.1	Pseudomonas syringae pv. syringae HS191 strain=HS191	Complete_ Genome
GCF_000988485.1	Pseudomonas syringae pv. syringae B301D strain=B301D	Complete_ Genome
GCF_001281365.1	Pseudomonas syringae UMAF0158 strain=UMAF0158	Complete_ Genome
GCF_001482725.1	Pseudomonas syringae pv. lapsa strain=ATCC 10859	Complete_ Genome
GCF_001913215.1	Pseudomonas syringae pv. actinidiae strain=NZ-45	Complete_ Genome
GCF_001913235.1	Pseudomonas syringae pv. actinidiae strain=NZ-47	Complete_ Genome
GCF_000020205.1	Ralstonia pickettii 12J strain=12J	Complete_ Genome
GCF_000023425.1	Ralstonia pickettii 12D strain=12D	Complete_ Genome
GCF_000471925.1	Ralstonia pickettii DTP0602 strain=DTP0602	Complete_ Genome
GCF_000297075.2	Pseudomonas pseudoalcaligenes CECT 5344 strain=CECT5344	Complete_ Genome
GCF_000953455.1	Pseudomonas pseudoalcaligenes	Complete_ Genome
GCF_000022645.2	Burkholderia glumae BGR1 strain=BGR1	Complete_ Genome
GCF_000835205.1	Burkholderia glumae PG1 strain=PG1	Complete_ Genome
GCF_000960995.1	Burkholderia glumae LMG 2196 = ATCC 33617 strain=ATCC 33617	Complete_ Genome
GCF_000007145.1	Xanthomonas campestris pv. campestris str. ATCC 33913 strain=ATCC 33913	Complete_ Genome
GCF_000012105.1	Xanthomonas campestris pv. campestris str. 8004 strain=8004	Complete_ Genome
GCF_000070605.1	Xanthomonas campestris pv. campestris strain=B100	Complete_ Genome
GCF_000221965.1	Xanthomonas campestris pv. raphani 756C	Complete_ Genome
GCF_000972745.1	Xanthomonas campestris strain=17	Complete_ Genome
GCF_001186415.1	Xanthomonas campestris pv. campestris strain=32	Complete_ Genome
GCF_001186465.1	Xanthomonas campestris pv. campestris strain=4013	Complete_ Genome
GCF_001021935.1	Xanthomonas translucens pv. undulosa strain=Xtu 4699	Complete_ Genome
GCF_900094325.1	Xanthomonas translucens pv. translucens DSM 18974 peng1	Complete_ Genome
GCF_000007165.1	Xanthomonas axonopodis pv. citri str. 306 strain=306	Complete_ Genome
GCF_000349225.1	Xanthomonas citri subsp. citri Aw12879 strain=Aw12879	Complete_ Genome
GCF_000816885.1	Xanthomonas citri subsp. citri A306	Complete_ Genome
GCF_000961155.1	Xanthomonas citri subsp. citri strain=UI7	Complete_ Genome
GCF_000961175.1	Xanthomonas citri subsp. citri UI6 strain=UI6	Complete_ Genome
GCF_000961195.1	Xanthomonas citri subsp. citri strain=NT17	Complete_ Genome
GCF_000961215.1	Xanthomonas citri subsp. citri strain=MN12	Complete_ Genome
GCF_000961235.1	Xanthomonas citri subsp. citri strain=MN11	Complete_ Genome
GCF_000961255.1	Xanthomonas citri subsp. citri strain=MN10	Complete_ Genome
GCF_000961275.1	Xanthomonas citri subsp. citri strain=MF20	Complete_ Genome
GCF_000961295.1	Xanthomonas citri subsp. citri strain=JX5	Complete_ Genome
GCF_000961315.1	Xanthomonas citri subsp. citri strain=JX4	Complete_ Genome
GCF_000961335.1	Xanthomonas citri subsp. citri strain=GD3	Complete_ Genome
GCF_000961355.1	Xanthomonas citri subsp. citri strain=GD2	Complete_ Genome
GCF_000961375.1	Xanthomonas citri subsp. citri strain=FB19	Complete_ Genome
GCF_000961395.1	Xanthomonas citri subsp. citri strain=BL18	Complete_ Genome
GCF_000961415.1	Xanthomonas citri subsp. citri strain=5208	Complete_ Genome
GCF_000961435.1	Xanthomonas citri subsp. citri strain=AW13	Complete_ Genome
GCF_000961455.1	Xanthomonas citri subsp. citri strain=AW14	Complete_ Genome
GCF_000961475.1	Xanthomonas citri subsp. citri strain=AW15	Complete_ Genome
GCF_000961495.1	Xanthomonas citri subsp. citri strain=AW16	Complete_ Genome
GCF_001028285.3	Xanthomonas citri pv. citri strain=jx-6	Complete_ Genome
GCF_001719145.1	Xanthomonas citri pv. malvacearum strain=MSCT	Complete_ Genome
GCF_001922045.1	Xanthomonas citri pv. citri strain=LL074-4	Complete_ Genome
GCF_001922065.1	Xanthomonas citri pv. citri strain=LH276	Complete_ Genome
GCF_001922085.1	Xanthomonas citri pv. citri strain=LJ207-7	Complete_ Genome
GCF_001922105.1	Xanthomonas citri pv. citri strain=LH201	Complete_ Genome
GCF_000007385.1	Xanthomonas oryzae pv. oryzae KACC 10331	Complete_ Genome
GCF_000010025.1	Xanthomonas oryzae pv. oryzae MAFF 311018 strain=MAFF 311018	Complete_ Genome
GCF_000019585.2	Xanthomonas oryzae pv. oryzae PXO99A strain=PXO99A	Complete_ Genome
GCF_000168315.3	Xanthomonas oryzae pv. oryzicola BLS256 strain=BLS256	Complete_ Genome
GCF_000940825.1	Xanthomonas oryzae pv. oryzicola strain=CFBP7342	Complete_ Genome
GCF_000948075.1	Xanthomonas oryzae pv. oryzae PXO86 strain=PXO86	Complete_ Genome
GCF_001021915.1	Xanthomonas oryzae pv. oryzicola strain=YM15	Complete_ Genome
GCF_001042735.1	Xanthomonas oryzae pv. oryzicola strain=CFBP2286	Complete_ Genome
GCF_001042745.1	Xanthomonas oryzae pv. oryzicola strain=B8-12	Complete_ Genome
GCF_001042775.1	Xanthomonas oryzae pv. oryzicola strain=BLS279	Complete_ Genome
GCF_001042795.1	Xanthomonas oryzae pv. oryzicola strain=BXOR1	Complete_ Genome
GCF_001042815.1	Xanthomonas oryzae pv. oryzicola strain=CFBP7331	Complete_ Genome
GCF_001042835.1	Xanthomonas oryzae pv. oryzicola strain=CFBP7341	Complete_ Genome
GCF_001042855.1	Xanthomonas oryzae pv. oryzicola strain=L8	Complete_ Genome
GCF_001042875.1	Xanthomonas oryzae pv. oryzicola strain=RS105	Complete_ Genome
GCF_001466505.1	Xanthomonas oryzae pv. oryzae strain=AXO1947	Complete_ Genome
GCF_001518895.1	Xanthomonas oryzae pv. oryzae strain=PXO83	Complete_ Genome
GCF_001746595.1	Xanthomonas oryzae pv. oryzae strain=PXO71	Complete_ Genome
GCF_001746615.1	Xanthomonas oryzae pv. oryzae strain=PXO145	Complete_ Genome
GCF_001746635.1	Xanthomonas oryzae pv. oryzae strain=PXO211	Complete_ Genome
GCF_001746655.1	Xanthomonas oryzae pv. oryzae strain=PXO236	Complete_ Genome
GCF_001746675.1	Xanthomonas oryzae pv. oryzae strain=PXO282	Complete_ Genome
GCF_001746695.1	Xanthomonas oryzae pv. oryzae strain=PXO524	Complete_ Genome
GCF_001746715.1	Xanthomonas oryzae pv. oryzae strain=PXO563	Complete_ Genome
GCF_001746735.1	Xanthomonas oryzae pv. oryzae strain=PXO602	Complete_ Genome
GCF_000817975.1	Azotobacter chroococcum NCIMB 8003 strain=NCIMB 8003	Complete_ Genome
GCF_000021045.1	Azotobacter vinelandii DJ strain=DJ; ATCC BAA-1303	Complete_ Genome
GCF_000380335.1	Azotobacter vinelandii CA	Complete_ Genome
GCF_000380365.1	Azotobacter vinelandii CA6	Complete_ Genome
GCF_000016265.1	Agrobacterium radiobacter K84 strain=K84 ATCC BAA-868	Complete_ Genome
GCF_000971565.1	Agrobacterium tumefaciens strain=Ach5	Complete_ Genome
GCF_001551895.1	Agrobacterium tumefaciens strain=S33	Complete_ Genome
GCF_000016285.1	Agrobacterium vitis S4 strain=S4 Kecskemet-Hungary; ATCC BAA-846	Complete_ Genome
GCF_000284375.1	Bradyrhizobium japonicum USDA 6 strain=USDA 6	Complete_ Genome
GCF_000807315.1	Bradyrhizobium japonicum strain=E109	Complete_ Genome
GCF_001887695.1	Bradyrhizobium japonicum strain=J5	Complete_ Genome
GCF_900011245.1	Bradyrhizobium sp.	Complete_ Genome
GCF_000018545.1	Sinorhizobium fredii NGR234 strain=NGR234	Complete_ Genome
GCF_000009625.1	Mesorhizobium loti MAFF303099 strain=MAFF303099	Complete_ Genome
GCF_001676765.1	Mesorhizobium loti NZP2037 strain=NZP2037	Complete_ Genome
GCF_000006965.1	Sinorhizobium meliloti 1021 strain=1021	Complete_ Genome
GCF_000147775.2	Sinorhizobium meliloti BL225C strain=BL225C	Complete_ Genome
GCF_000147795.2	Sinorhizobium meliloti AK83 strain=AK83	Complete_ Genome
GCF_000218265.1	Sinorhizobium meliloti SM11 strain=SM11	Complete_ Genome
GCF_000304415.1	Sinorhizobium meliloti Rm41 strain=Rm41	Complete_ Genome
GCF_000320385.2	Sinorhizobium meliloti GR4 strain=GR4	Complete_ Genome
GCF_000346065.1	Sinorhizobium meliloti 2011 strain=2011	Complete_ Genome
GCF_000747295.1	Sinorhizobium meliloti strain=RMO17	Complete_ Genome
GCF_000009265.1	Rhizobium leguminosarum bv. viciae 3841	Complete_ Genome
GCF_000021345.1	Rhizobium leguminosarum bv. trifolii WSM2304 strain=WSM2304	Complete_ Genome
GCF_000023185.1	Rhizobium leguminosarum bv. trifolii WSM1325 strain=WSM1325	Complete_ Genome
GCF_000517605.1	Rhizobium leguminosarum bv. trifolii WSM1689 strain=WSM1689	Complete_ Genome
GCF_000520875.1	Rhizobium leguminosarum bv. trifolii CB782 strain=CB782	Complete_ Genome
GCF_001679785.1	Rhizobium leguminosarum strain=Vaf10	Complete_ Genome
GCF_001890425.1	Rhizobium leguminosarum strain=Vaf-108	Complete_ Genome
GCF_001664105.1	Rhizobium phaseoli strain=N261	Complete_ Genome
GCF_001664125.1	Rhizobium phaseoli strain=N831	Complete_ Genome
GCF_001664165.1	Rhizobium phaseoli strain=N161	Complete_ Genome
GCF_001664185.1	Rhizobium phaseoli strain=R744	Complete_ Genome
GCF_001664205.1	Rhizobium phaseoli strain=R630	Complete_ Genome
GCF_001664225.1	Rhizobium phaseoli strain=R723	Complete_ Genome
GCF_001664245.1	Rhizobium phaseoli strain=R620	Complete_ Genome
GCF_001664285.1	Rhizobium phaseoli strain=N931	Complete_ Genome
GCF_001664365.1	Rhizobium phaseoli strain=N671	Complete_ Genome
GCF_001664385.1	Rhizobium phaseoli strain=R650	Complete_ Genome
GCF_001664405.1	Rhizobium phaseoli strain=N771	Complete_ Genome
GCF_001664425.1	Rhizobium phaseoli strain=N841	Complete_ Genome
GCF_001664445.1	Rhizobium phaseoli strain=R611	Complete_ Genome
GCF_000330885.1	Rhizobium tropici CIAT 899 strain=CIAT 899	Complete_ Genome
GCF_000731295.1	Neorhizobium galegae bv. officinalis bv. officinalis str. HAMBI 1141 strain=HAMBI 1141	Complete_ Genome
GCF_000731315.1	Neorhizobium galegae bv. orientalis str. HAMBI 540 strain=HAMBI 540	Complete_ Genome
GCF_000013705.1	Methylobacillus flagellatus KT strain=KT	Complete_ Genome
GCF_000018845.1	Methylobacterium extorquens PA1 strain=PA1	Complete_ Genome
GCF_000021845.1	Methylobacterium extorquens CM4 strain=CM4	Complete_ Genome
GCF_000022685.1	Methylobacterium extorquens AM1 strain=AM1	Complete_ Genome
GCF_000083545.1	Methylobacterium extorquens DM4 strain=DM4	Complete_ Genome
GCF_001971665.1	Methylobacterium extorquens strain=PSBB040	Complete_ Genome
GCF_000008325.1	Methylococcus capsulatus str. Bath strain=Bath	Complete_ Genome
GCF_000214665.1	Methylomonas methanica MC09 strain=MC09	Complete_ Genome
GCF_000010825.1	Acetobacter pasteurianus IFO 3283-01 strain=IFO 3283 substr. IFO 3283-01	Complete_ Genome
GCF_000010845.1	Acetobacter pasteurianus IFO 3283-03 strain=IFO 3283 substr. IFO 3283-03	Complete_ Genome
GCF_000010865.1	Acetobacter pasteurianus IFO 3283-07 strain=IFO 3283 substr. IFO 3283-07	Complete_ Genome
GCF_000010885.1	Acetobacter pasteurianus IFO 3283-22 strain=IFO 3283 substr. IFO 3283-22	Complete_ Genome
GCF_000010905.1	Acetobacter pasteurianus IFO 3283-26 strain=IFO 3283 substr. IFO 3283-26	Complete_ Genome
GCF_000010925.1	Acetobacter pasteurianus IFO 3283-32 strain=IFO 3283 substr. IFO 3283-32	Complete_ Genome
GCF_000010945.1	Acetobacter pasteurianus IFO 3283-01-42C strain=IFO 3283 substr. IFO 3283-01-42C	Complete_ Genome
GCF_000010965.1	Acetobacter pasteurianus IFO 3283-12 strain=IFO 3283 substr. IFO 3283-12	Complete_ Genome
GCF_000241585.2	Acetobacter pasteurianus NBRC 101655 strain=NBRC 101655	Complete_ Genome
GCF_000723785.2	Acetobacter pasteurianus 386B strain=386B	Complete_ Genome
GCF_001183745.1	Acetobacter pasteurianus strain=Ab3	Complete_ Genome
GCF_001766235.1	Acetobacter pasteurianus subsp. ascendens strain=LMG 1590	Complete_ Genome
GCF_001766255.1	Acetobacter pasteurianus subsp. paradoxus strain=LMG 1591	Complete_ Genome
GCF_000011685.1	Gluconobacter oxydans 621H strain=621H	Complete_ Genome
GCF_000311765.1	Gluconobacter oxydans H24 strain=H24	Complete_ Genome
GCF_000583855.1	Gluconobacter oxydans DSM 3504	Complete_ Genome
GCF_001680825.1	Gluconobacter oxydans strain=1.637	Complete_ Genome
GCF_000008485.1	Legionella pneumophila subsp. pneumophila str. Philadelphia 1 strain=Philadelphia 1	Complete_ Genome
GCF_000048645.1	Legionella pneumophila str. Paris strain=Paris	Complete_ Genome
GCF_000048665.1	Legionella pneumophila str. Lens strain=Lens	Complete_ Genome
GCF_000092545.1	Legionella pneumophila str. Corby strain=Corby	Complete_ Genome
GCF_000092625.1	Legionella pneumophila 2300/99 Alcoy strain=2300/99 Alcoy	Complete_ Genome
GCF_000239175.1	Legionella pneumophila subsp. pneumophila ATCC 43290 strain=ATCC 43290	Complete_ Genome
GCF_000306845.1	Legionella pneumophila subsp. pneumophila strain=HL06041035	Complete_ Genome
GCF_000306865.1	Legionella pneumophila subsp. pneumophila strain=Lorraine	Complete_ Genome
GCF_000347615.1	Legionella pneumophila subsp. pneumophila LPE509 strain=LPE509	Complete_ Genome
GCF_001590615.1	Legionella pneumophila subsp. pascullei strain=F-4185	Complete_ Genome
GCF_001590645.1	Legionella pneumophila subsp. pascullei strain=D-7158	Complete_ Genome
GCF_001590695.1	Legionella pneumophila subsp. pascullei strain=D-7119	Complete_ Genome
GCF_001592705.1	Legionella pneumophila subsp. pneumophila strain=Toronto-20052	Complete_ Genome
GCF_001610735.1	Legionella pneumophila strain=L10-023 Ulm	Complete_ Genome
GCF_001652645.1	Legionella pneumophila strain=D-7632	Complete_ Genome
GCF_001652665.1	Legionella pneumophila strain=D-7631	Complete_ Genome
GCF_001652685.1	Legionella pneumophila strain=D-7630	Complete_ Genome
GCF_001677075.2	Legionella pneumophila strain=OLDA	Complete_ Genome
GCF_001677115.2	Legionella pneumophila strain=Pontiac	Complete_ Genome
GCF_001752705.1	Legionella pneumophila strain=E10_P	Complete_ Genome
GCF_001752725.1	Legionella pneumophila strain=E11_U	Complete_ Genome
GCF_001752745.1	Legionella pneumophila strain=Philadelphia_1_ATCC	Complete_ Genome
GCF_001752765.1	Legionella pneumophila strain=Philadelphia_1_CDC	Complete_ Genome
GCF_001752785.1	Legionella pneumophila strain=Philadelphia_2	Complete_ Genome
GCF_001752805.1	Legionella pneumophila strain=Philadelphia_3	Complete_ Genome
GCF_001752825.1	Legionella pneumophila strain=Philadelphia_4	Complete_ Genome
GCF_001752845.1	Legionella pneumophila strain=C1_S	Complete_ Genome
GCF_001752865.1	Legionella pneumophila strain=C2_S	Complete_ Genome
GCF_001752885.1	Legionella pneumophila strain=C3_O	Complete_ Genome
GCF_001752905.1	Legionella pneumophila strain=C4_S	Complete_ Genome
GCF_001752925.1	Legionella pneumophila strain=C5_P	Complete_ Genome
GCF_001752945.1	Legionella pneumophila strain=C6_S	Complete_ Genome
GCF_001752965.1	Legionella pneumophila strain=C7_O	Complete_ Genome
GCF_001753065.1	Legionella pneumophila strain=C8_S	Complete_ Genome
GCF_001753085.1	Legionella pneumophila strain=C9_S	Complete_ Genome
GCF_001753105.1	Legionella pneumophila strain=C10_S	Complete_ Genome
GCF_001753125.1	Legionella pneumophila strain=C11_O	Complete_ Genome
GCF_001753145.1	Legionella pneumophila strain=E1_P	Complete_ Genome
GCF_001753265.1	Legionella pneumophila strain=E2_N	Complete_ Genome
GCF_001753285.1	Legionella pneumophila strain=E3_N	Complete_ Genome
GCF_001753305.1	Legionella pneumophila strain=E4_N	Complete_ Genome
GCF_001753325.1	Legionella pneumophila strain=E5_N	Complete_ Genome
GCF_001753345.1	Legionella pneumophila strain=E6_N	Complete_ Genome
GCF_001753365.1	Legionella pneumophila strain=E7_O	Complete_ Genome
GCF_001753385.1	Legionella pneumophila strain=E8_O	Complete_ Genome
GCF_001753405.1	Legionella pneumophila strain=E9_O	Complete_ Genome
GCF_001766275.1	Legionella pneumophila subsp. pneumophila strain=FFI102	Complete_ Genome
GCF_001766295.1	Legionella pneumophila subsp. pneumophila strain=FFI103	Complete_ Genome
GCF_001766315.1	Legionella pneumophila subsp. pneumophila strain=FFI104	Complete_ Genome
GCF_001766335.1	Legionella pneumophila subsp. pneumophila strain=FFI105	Complete_ Genome
GCF_001766355.1	Legionella pneumophila subsp. pneumophila strain=FFI329	Complete_ Genome
GCF_001766375.1	Legionella pneumophila subsp. pneumophila strain=FFI337	Complete_ Genome
GCF_001886795.1	Legionella pneumophila subsp. fraseri strain=Detroit-1	Complete_ Genome
GCF_001886835.1	Legionella pneumophila subsp. fraseri strain=Dallas 1E	Complete_ Genome
GCF_001941585.1	Legionella pneumophila strain=Philadelphia-1 AE	Complete_ Genome
GCF_001969405.1	Legionella pneumophila strain=F4469	Complete_ Genome
GCF_001989475.1	Legionella pneumophila strain=F4468	Complete_ Genome
GCF_900092465.1	Legionella pneumophila strain=Lpm7613 Lpm7613	Complete_ Genome
GCF_900119755.1	Legionella pneumophila strain=ST23 ST23	Complete_ Genome
GCF_900119765.1	Legionella pneumophila strain=ST62 ST62	Complete_ Genome
GCF_900119775.1	Legionella pneumophila strain=ST37 ST37	Complete_ Genome
GCF_900119785.1	Legionella pneumophila strain=ST42 ST42	Complete_ Genome
GCF_000953655.1	Legionella hackeliae strain=ATCC 35250	Complete_ Genome
GCF_000091785.1	Legionella longbeachae NSW150 strain=NSW150	Complete_ Genome
GCF_000953635.1	Tatlockia micdadei strain=ATCC 33218	Complete_ Genome
GCF_000018445.1	Acinetobacter baumannii ACICU strain=ACICU	Complete_ Genome
GCF_000021145.1	Acinetobacter baumannii AB307-0294 strain=AB307-0294	Complete_ Genome
GCF_000021245.1	Acinetobacter baumannii AB0057 strain=AB0057	Complete_ Genome
GCF_000069245.1	Acinetobacter baumannii AYE strain=AYE	Complete_ Genome
GCF_000186665.3	Acinetobacter baumannii D1279779 strain=D1279779	Complete_ Genome
GCF_000187205.2	Acinetobacter baumannii MDR-TJ strain=MDR-TJ	Complete_ Genome
GCF_000188215.1	Acinetobacter baumannii 1656-2 strain=1656-2	Complete_ Genome
GCF_000226275.1	Acinetobacter baumannii MDR-ZJ06 strain=MDR-ZJ06	Complete_ Genome
GCF_000302575.1	Acinetobacter baumannii TYTH-1 strain=TYTH-1	Complete_ Genome
GCF_000419385.1	Acinetobacter baumannii BJAB07104 strain=BJAB07104	Complete_ Genome
GCF_000419405.1	Acinetobacter baumannii BJAB0715 strain=BJAB0715	Complete_ Genome
GCF_000419425.1	Acinetobacter baumannii BJAB0868 strain=BJAB0868	Complete_ Genome
GCF_000498375.2	Acinetobacter baumannii DU202 strain=DU202	Complete_ Genome
GCF_000505685.1	Acinetobacter baumannii ZW85-1 strain=ZW85-1	Complete_ Genome
GCF_000695855.3	Acinetobacter baumannii strain=AC29	Complete_ Genome
GCF_000746605.1	Acinetobacter baumannii strain=AB31	Complete_ Genome
GCF_000746645.1	Acinetobacter baumannii strain=AB30	Complete_ Genome
GCF_000761175.1	Acinetobacter baumannii strain=Strain AbH12O-A2	Complete_ Genome
GCF_000786735.1	Acinetobacter baumannii LAC-4 strain=LAC-4	Complete_ Genome
GCF_000814345.1	Acinetobacter baumannii strain=6200	Complete_ Genome
GCF_000828795.1	Acinetobacter baumannii NCGM 237 strain=NCGM 237	Complete_ Genome
GCF_000828935.1	Acinetobacter baumannii strain=IOMTU433	Complete_ Genome
GCF_000830055.1	Acinetobacter baumannii isolate A1	Complete_ Genome
GCF_000939415.2	Acinetobacter baumannii strain=ORAB01	Complete_ Genome
GCF_000963815.1	Acinetobacter baumannii strain=AB5075-UW	Complete_ Genome
GCF_001026965.1	Acinetobacter baumannii strain=XH386	Complete_ Genome
GCF_001077655.1	Acinetobacter baumannii strain=Ab04-mff	Complete_ Genome
GCF_001077675.1	Acinetobacter baumannii strain=ATCC 17978-mff	Complete_ Genome
GCF_001261895.2	Acinetobacter baumannii R2090	Complete_ Genome
GCF_001399655.1	Acinetobacter baumannii strain=D36	Complete_ Genome
GCF_001457535.1	Acinetobacter baumannii CIP70.10	Complete_ Genome
GCF_001514375.1	Acinetobacter baumannii strain=KBN10P02143	Complete_ Genome
GCF_001517645.1	Acinetobacter baumannii R2091	Complete_ Genome
GCF_001543995.1	Acinetobacter baumannii strain=R612	Complete_ Genome
GCF_001573065.1	Acinetobacter baumannii strain=XH860	Complete_ Genome
GCF_001573085.1	Acinetobacter baumannii strain=XH859	Complete_ Genome
GCF_001573105.1	Acinetobacter baumannii strain=XH857	Complete_ Genome
GCF_001573125.1	Acinetobacter baumannii strain=XH856	Complete_ Genome
GCF_001578145.1	Acinetobacter baumannii strain=XH858	Complete_ Genome
GCF_001593425.2	Acinetobacter baumannii strain=ATCC 17978	Complete_ Genome
GCF_001636235.1	Acinetobacter baumannii strain=3207	Complete_ Genome
GCF_001806345.1	Acinetobacter baumannii strain=KAB01	Complete_ Genome
GCF_001806365.1	Acinetobacter baumannii strain=KAB02	Complete_ Genome
GCF_001806385.1	Acinetobacter baumannii strain=KAB03	Complete_ Genome
GCF_001806405.1	Acinetobacter baumannii strain=KAB04	Complete_ Genome
GCF_001806425.1	Acinetobacter baumannii strain=KAB05	Complete_ Genome
GCF_001806445.1	Acinetobacter baumannii strain=KAB06	Complete_ Genome
GCF_001806465.1	Acinetobacter baumannii strain=KAB07	Complete_ Genome
GCF_001806485.1	Acinetobacter baumannii strain=KAB08	Complete_ Genome
GCF_001887305.1	Acinetobacter baumannii strain=HRAB-85	Complete_ Genome
GCF_001895985.1	Acinetobacter baumannii strain=AF-673	Complete_ Genome
GCF_001896005.1	Acinetobacter baumannii strain=AF-401	Complete_ Genome
GCF_001902375.1	Acinetobacter baumannii strain=XDR-BJ83	Complete_ Genome
GCF_001922205.1	Acinetobacter baumannii strain=CMC-CR-MDR-Ab4	Complete_ Genome
GCF_001922225.1	Acinetobacter baumannii strain=CMC-MDR-Ab59	Complete_ Genome
GCF_001922245.1	Acinetobacter baumannii strain=CMC-CR-MDR-Ab66	Complete_ Genome
GCF_001941765.1	Acinetobacter baumannii strain=AB042	Complete_ Genome
GCF_900088705.1	Acinetobacter baumannii strain=062	Complete_ Genome
GCF_000092265.1	Moraxella catarrhalis BBH18 strain=BBH18	Complete_ Genome
GCF_000740455.1	Moraxella catarrhalis strain=25240	Complete_ Genome
GCF_000766665.1	Moraxella catarrhalis strain=ATCC 25239	Complete_ Genome
GCF_000006845.1	Neisseria gonorrhoeae FA 1090 strain=FA 1090	Complete_ Genome
GCF_000020105.1	Neisseria gonorrhoeae NCCP11945 strain=NCCP11945	Complete_ Genome
GCF_000156855.2	Neisseria gonorrhoeae MS11 strain=MS11	Complete_ Genome
GCF_001047225.1	Neisseria gonorrhoeae strain=FA19	Complete_ Genome
GCF_001047255.1	Neisseria gonorrhoeae strain=FA6140	Complete_ Genome
GCF_001047275.1	Neisseria gonorrhoeae strain=35/02	Complete_ Genome
GCF_001661085.1	Neisseria gonorrhoeae strain=32867	Complete_ Genome
GCF_001661115.1	Neisseria gonorrhoeae strain=34530	Complete_ Genome
GCF_001661135.1	Neisseria gonorrhoeae strain=34769	Complete_ Genome
GCF_000196295.1	Neisseria lactamica 020-06 strain=020-06	Complete_ Genome
GCF_000008805.1	Neisseria meningitidis MC58 strain=MC58	Complete_ Genome
GCF_000009105.1	Neisseria meningitidis Z2491	Complete_ Genome
GCF_000009465.1	Neisseria meningitidis FAM18	Complete_ Genome
GCF_000014105.1	Neisseria meningitidis 053442 strain=53442	Complete_ Genome
GCF_000026965.1	Neisseria meningitidis 8013 strain=8013	Complete_ Genome
GCF_000083565.1	Neisseria meningitidis alpha14 strain=alpha14	Complete_ Genome
GCF_000152165.1	Neisseria meningitidis alpha710 strain=alpha710	Complete_ Genome
GCF_000191425.1	Neisseria meningitidis G2136 strain=G2136	Complete_ Genome
GCF_000191445.1	Neisseria meningitidis H44/76 strain=H44/76	Complete_ Genome
GCF_000191465.1	Neisseria meningitidis M01-240149 strain=M01-240149	Complete_ Genome
GCF_000191485.1	Neisseria meningitidis M01-240355 strain=M01-240355	Complete_ Genome
GCF_000191505.1	Neisseria meningitidis M04-240196 strain=M04-240196	Complete_ Genome
GCF_000191525.1	Neisseria meningitidis NZ-05/33 strain=NZ-05/33	Complete_ Genome
GCF_000253215.1	Neisseria meningitidis WUE 2594 strain=WUE 2594	Complete_ Genome
GCF_000626595.1	Neisseria meningitidis patient	Complete_ Genome
GCF_000787195.2	Neisseria meningitidis strain=L91543	Complete_ Genome
GCF_000800235.1	Neisseria meningitidis strain=NM3686	Complete_ Genome
GCF_000800275.1	Neisseria meningitidis M7124 strain=M7124	Complete_ Genome
GCF_000800315.1	Neisseria meningitidis strain=NM3682 NM3682	Complete_ Genome
GCF_000800355.1	Neisseria meningitidis strain=NM3683	Complete_ Genome
GCF_000800415.1	Neisseria meningitidis strain=M10208	Complete_ Genome
GCF_000816165.1	Neisseria meningitidis LNP21362 LNP21362	Complete_ Genome
GCF_001029815.1	Neisseria meningitidis strain=B6116/77	Complete_ Genome
GCF_001029835.1	Neisseria meningitidis M0579 strain=M0579	Complete_ Genome
GCF_001697105.1	Neisseria meningitidis strain=DE8669	Complete_ Genome
GCF_001697125.1	Neisseria meningitidis strain=DE10444	Complete_ Genome
GCF_001697165.1	Neisseria meningitidis strain=DE8555	Complete_ Genome
GCF_001697205.1	Neisseria meningitidis strain=WUE2121	Complete_ Genome
GCF_001697305.1	Neisseria meningitidis strain=M22718	Complete_ Genome
GCF_001697325.1	Neisseria meningitidis strain=M12752	Complete_ Genome
GCF_001697345.1	Neisseria meningitidis strain=M22819	Complete_ Genome
GCF_001697365.1	Neisseria meningitidis strain=M22809	Complete_ Genome
GCF_001697385.1	Neisseria meningitidis strain=M09293	Complete_ Genome
GCF_001697405.1	Neisseria meningitidis strain=M22189	Complete_ Genome
GCF_001697425.1	Neisseria meningitidis strain=M07149	Complete_ Genome
GCF_001697445.1	Neisseria meningitidis strain=M25474	Complete_ Genome
GCF_001697465.1	Neisseria meningitidis strain=M08001	Complete_ Genome
GCF_001697485.1	Neisseria meningitidis strain=M22748	Complete_ Genome
GCF_001697505.1	Neisseria meningitidis strain=M22811	Complete_ Genome
GCF_001697525.1	Neisseria meningitidis strain=M22772	Complete_ Genome
GCF_001697545.1	Neisseria meningitidis strain=M22769	Complete_ Genome
GCF_001697565.1	Neisseria meningitidis strain=M22745	Complete_ Genome
GCF_001697585.1	Neisseria meningitidis strain=M24730	Complete_ Genome
GCF_001697605.1	Neisseria meningitidis strain=M22801	Complete_ Genome
GCF_001697625.1	Neisseria meningitidis strain=M22804	Complete_ Genome
GCF_001697645.1	Neisseria meningitidis strain=M25438	Complete_ Genome
GCF_001697665.1	Neisseria meningitidis strain=M23413	Complete_ Genome
GCF_001697685.1	Neisseria meningitidis strain=M22722	Complete_ Genome
GCF_001697705.1	Neisseria meningitidis strain=M25070	Complete_ Genome
GCF_001697725.1	Neisseria meningitidis strain=M09261	Complete_ Genome
GCF_001697745.1	Neisseria meningitidis strain=M25462	Complete_ Genome
GCF_001697765.1	Neisseria meningitidis strain=M27559	Complete_ Genome
GCF_001697785.1	Neisseria meningitidis strain=M25472	Complete_ Genome
GCF_001697805.1	Neisseria meningitidis strain=M22759	Complete_ Genome
GCF_001697825.1	Neisseria meningitidis strain=M25087	Complete_ Genome
GCF_001697845.1	Neisseria meningitidis strain=M22783	Complete_ Genome
GCF_001697865.1	Neisseria meningitidis strain=M22828	Complete_ Genome
GCF_001697885.1	Neisseria meningitidis strain=M25459	Complete_ Genome
GCF_001697905.1	Neisseria meningitidis strain=M22160	Complete_ Genome
GCF_001697925.1	Neisseria meningitidis strain=M07161	Complete_ Genome
GCF_001697945.1	Neisseria meningitidis strain=M25476	Complete_ Genome
GCF_001697965.1	Neisseria meningitidis strain=M25456	Complete_ Genome
GCF_001697985.1	Neisseria meningitidis strain=M25419	Complete_ Genome
GCF_001698005.1	Neisseria meningitidis strain=M22740	Complete_ Genome
GCF_001698025.1	Neisseria meningitidis strain=M22822	Complete_ Genome
GCF_001698045.1	Neisseria meningitidis strain=M07162	Complete_ Genome
GCF_001698065.1	Neisseria meningitidis strain=M08000	Complete_ Genome
GCF_001698085.1	Neisseria meningitidis strain=M24705	Complete_ Genome
GCF_001698105.1	Neisseria meningitidis strain=M22191	Complete_ Genome
GCF_001750825.1	Neisseria meningitidis strain=331401	Complete_ Genome
GCF_000818035.1	Neisseria elongata subsp. glycolytica ATCC 29315 strain=ATCC 29315	Complete_ Genome
GCF_000021685.1	Thermomicrobium roseum DSM 5159 strain=DSM 5159	Complete_ Genome
GCF_001458475.1	Kingella kingae strain=KWG1	Complete_ Genome
GCF_000967305.2	Alcaligenes faecalis strain=ZD02	Complete_ Genome
GCF_000195675.1	Bordetella bronchiseptica RB50 strain=RB50	Complete_ Genome
GCF_000317955.1	Bordetella bronchiseptica MO149 strain=MO149	Complete_ Genome
GCF_000318015.1	Bordetella bronchiseptica 253 strain=253	Complete_ Genome
GCF_000829175.1	Bordetella bronchiseptica strain=S798	Complete_ Genome
GCF_001704355.1	Bordetella bronchiseptica strain=I328	Complete_ Genome
GCF_000195695.1	Bordetella parapertussis 12822 strain=12822	Complete_ Genome
GCF_000317935.1	Bordetella parapertussis Bpp5 strain=Bpp5	Complete_ Genome
GCF_001704255.1	Bordetella parapertussis strain=H904	Complete_ Genome
GCF_000193595.2	Bordetella pertussis B1917 strain=B1917	Complete_ Genome
GCF_000195715.1	Bordetella pertussis Tohama I strain=Tohama I	Complete_ Genome
GCF_000212975.1	Bordetella pertussis CS strain=CS	Complete_ Genome
GCF_000306945.1	Bordetella pertussis 18323 strain=18323	Complete_ Genome
GCF_000812165.1	Bordetella pertussis 137 strain=137	Complete_ Genome
GCF_001013565.1	Bordetella pertussis strain=D420	Complete_ Genome
GCF_001307525.1	Bordetella pertussis strain=B3629	Complete_ Genome
GCF_001307565.1	Bordetella pertussis strain=B3621	Complete_ Genome
GCF_001307585.1	Bordetella pertussis strain=B1838	Complete_ Genome
GCF_001307605.1	Bordetella pertussis strain=B1865	Complete_ Genome
GCF_001307625.1	Bordetella pertussis strain=B3405	Complete_ Genome
GCF_001307645.1	Bordetella pertussis strain=B3582	Complete_ Genome
GCF_001307665.1	Bordetella pertussis strain=B3585	Complete_ Genome
GCF_001307685.1	Bordetella pertussis strain=B3640	Complete_ Genome
GCF_001307705.1	Bordetella pertussis strain=B3658	Complete_ Genome
GCF_001307725.1	Bordetella pertussis strain=B3913	Complete_ Genome
GCF_001307745.1	Bordetella pertussis strain=B3921	Complete_ Genome
GCF_001509895.1	Bordetella pertussis strain=H321	Complete_ Genome
GCF_001509915.1	Bordetella pertussis strain=I979	Complete_ Genome
GCF_001605035.1	Bordetella pertussis strain=H374	Complete_ Genome
GCF_001605055.1	Bordetella pertussis strain=H378	Complete_ Genome
GCF_001605075.1	Bordetella pertussis strain=H379	Complete_ Genome
GCF_001605095.1	Bordetella pertussis strain=H380	Complete_ Genome
GCF_001605115.1	Bordetella pertussis strain=H559	Complete_ Genome
GCF_001605135.1	Bordetella pertussis strain=H375	Complete_ Genome
GCF_001605155.1	Bordetella pertussis strain=H627	Complete_ Genome
GCF_001605175.1	Bordetella pertussis strain=H489	Complete_ Genome
GCF_001605195.1	Bordetella pertussis strain=H542	Complete_ Genome
GCF_001605215.1	Bordetella pertussis strain=H561	Complete_ Genome
GCF_001605235.1	Bordetella pertussis strain=H563	Complete_ Genome
GCF_001605255.1	Bordetella pertussis strain=H622	Complete_ Genome
GCF_001605275.1	Bordetella pertussis strain=C393	Complete_ Genome
GCF_001605295.1	Bordetella pertussis strain=E476	Complete_ Genome
GCF_001605345.1	Bordetella pertussis strain=H564	Complete_ Genome
GCF_001605365.1	Bordetella pertussis strain=H788	Complete_ Genome
GCF_001605385.1	Bordetella pertussis strain=I468	Complete_ Genome
GCF_001605405.1	Bordetella pertussis strain=I469	Complete_ Genome
GCF_001605425.1	Bordetella pertussis strain=I472	Complete_ Genome
GCF_001605445.1	Bordetella pertussis strain=I476	Complete_ Genome
GCF_001605465.1	Bordetella pertussis strain=I480	Complete_ Genome
GCF_001605485.1	Bordetella pertussis strain=I483	Complete_ Genome
GCF_001605505.1	Bordetella pertussis strain=I496	Complete_ Genome
GCF_001605525.1	Bordetella pertussis strain=I498	Complete_ Genome
GCF_001605545.1	Bordetella pertussis strain=I518	Complete_ Genome
GCF_001605565.1	Bordetella pertussis strain=I521	Complete_ Genome
GCF_001605585.1	Bordetella pertussis strain=I538	Complete_ Genome
GCF_001605605.1	Bordetella pertussis strain=I539	Complete_ Genome
GCF_001605625.1	Bordetella pertussis strain=I646	Complete_ Genome
GCF_001605645.1	Bordetella pertussis strain=I656	Complete_ Genome
GCF_001605665.1	Bordetella pertussis strain=I669	Complete_ Genome
GCF_001605685.1	Bordetella pertussis strain=I707	Complete_ Genome
GCF_001628735.1	Bordetella pertussis strain=I344	Complete_ Genome
GCF_001686365.1	Bordetella pertussis strain=VA-190	Complete_ Genome
GCF_001686405.1	Bordetella pertussis strain=VA-194	Complete_ Genome
GCF_001686425.1	Bordetella pertussis strain=VA-175	Complete_ Genome
GCF_001686445.1	Bordetella pertussis strain=VA-150	Complete_ Genome
GCF_001686465.1	Bordetella pertussis strain=VA-52	Complete_ Genome
GCF_001686485.1	Bordetella pertussis strain=VA-198	Complete_ Genome
GCF_001686505.1	Bordetella pertussis strain=VA-09	Complete_ Genome
GCF_001686525.1	Bordetella pertussis strain=VA-15	Complete_ Genome
GCF_001686545.1	Bordetella pertussis strain=VA-18	Complete_ Genome
GCF_001686565.1	Bordetella pertussis strain=VA-62	Complete_ Genome
GCF_001686585.1	Bordetella pertussis strain=VA-145	Complete_ Genome
GCF_001686605.1	Bordetella pertussis strain=VA-10	Complete_ Genome
GCF_001686625.1	Bordetella pertussis strain=UT25Sm1	Complete_ Genome
GCF_001687385.1	Bordetella pertussis strain=B203	Complete_ Genome
GCF_001687405.1	Bordetella pertussis strain=B202	Complete_ Genome
GCF_001831395.1	Bordetella pertussis strain=J445	Complete_ Genome
GCF_001831415.1	Bordetella pertussis strain=J446	Complete_ Genome
GCF_001831435.1	Bordetella pertussis strain=J447	Complete_ Genome
GCF_001831455.1	Bordetella pertussis strain=J448	Complete_ Genome
GCF_001984925.1	Bordetella pertussis strain=C571	Complete_ Genome
GCF_001984945.1	Bordetella pertussis strain=C958	Complete_ Genome
GCF_001984965.1	Bordetella pertussis strain=D521	Complete_ Genome
GCF_001984985.1	Bordetella pertussis strain=D879	Complete_ Genome
GCF_001985005.1	Bordetella pertussis strain=E150	Complete_ Genome
GCF_001985025.1	Bordetella pertussis strain=E555	Complete_ Genome
GCF_001985045.1	Bordetella pertussis strain=E587	Complete_ Genome
GCF_001985065.1	Bordetella pertussis strain=E809	Complete_ Genome
GCF_001985085.1	Bordetella pertussis strain=E976	Complete_ Genome
GCF_001985105.1	Bordetella pertussis strain=F011	Complete_ Genome
GCF_001985125.1	Bordetella pertussis strain=F034	Complete_ Genome
GCF_001985145.1	Bordetella pertussis strain=F658	Complete_ Genome
GCF_001985165.1	Bordetella pertussis strain=F670	Complete_ Genome
GCF_001985205.1	Bordetella pertussis strain=F687	Complete_ Genome
GCF_001985225.1	Bordetella pertussis strain=F948	Complete_ Genome
GCF_001985245.1	Bordetella pertussis strain=H520	Complete_ Genome
GCF_001985265.1	Bordetella pertussis strain=H579	Complete_ Genome
GCF_001985285.1	Bordetella pertussis strain=H637	Complete_ Genome
GCF_001985305.1	Bordetella pertussis strain=H665	Complete_ Genome
GCF_001985325.1	Bordetella pertussis strain=H703	Complete_ Genome
GCF_001985345.1	Bordetella pertussis strain=H707	Complete_ Genome
GCF_001985365.1	Bordetella pertussis strain=H729	Complete_ Genome
GCF_001985385.1	Bordetella pertussis strain=H740	Complete_ Genome
GCF_001985405.1	Bordetella pertussis strain=H754	Complete_ Genome
GCF_001985425.1	Bordetella pertussis strain=H765	Complete_ Genome
GCF_001985445.1	Bordetella pertussis strain=H784	Complete_ Genome
GCF_001985465.1	Bordetella pertussis strain=H800	Complete_ Genome
GCF_001985485.1	Bordetella pertussis strain=H806	Complete_ Genome
GCF_001985505.1	Bordetella pertussis strain=H810	Complete_ Genome
GCF_001985525.1	Bordetella pertussis strain=H812	Complete_ Genome
GCF_001985545.1	Bordetella pertussis strain=I228	Complete_ Genome
GCF_001985565.1	Bordetella pertussis strain=I238	Complete_ Genome
GCF_001985585.1	Bordetella pertussis strain=I373	Complete_ Genome
GCF_001985605.1	Bordetella pertussis strain=I387	Complete_ Genome
GCF_001985625.1	Bordetella pertussis strain=I602	Complete_ Genome
GCF_001985645.1	Bordetella pertussis strain=I730	Complete_ Genome
GCF_001985665.1	Bordetella pertussis strain=I752	Complete_ Genome
GCF_001985685.1	Bordetella pertussis strain=I763	Complete_ Genome
GCF_001985705.1	Bordetella pertussis strain=I915	Complete_ Genome
GCF_001985725.1	Bordetella pertussis strain=I944	Complete_ Genome
GCF_001985745.1	Bordetella pertussis strain=J018	Complete_ Genome
GCF_001985765.1	Bordetella pertussis strain=H681	Complete_ Genome
GCF_001985785.1	Bordetella pertussis strain=H852	Complete_ Genome
GCF_001985805.1	Bordetella pertussis strain=I106	Complete_ Genome
GCF_001985825.1	Bordetella pertussis strain=I351	Complete_ Genome
GCF_001985845.1	Bordetella pertussis strain=I743	Complete_ Genome
GCF_001985865.1	Bordetella pertussis strain=I751	Complete_ Genome
GCF_001985885.1	Bordetella pertussis strain=I976	Complete_ Genome
GCF_001985905.1	Bordetella pertussis strain=J010	Complete_ Genome
GCF_001985925.1	Bordetella pertussis strain=J013	Complete_ Genome
GCF_001985945.1	Bordetella pertussis strain=J038	Complete_ Genome
GCF_001985965.1	Bordetella pertussis strain=J107	Complete_ Genome
GCF_001986005.1	Bordetella pertussis strain=G057	Complete_ Genome
GCF_001986025.1	Bordetella pertussis strain=H639	Complete_ Genome
GCF_001986045.1	Bordetella pertussis strain=I150	Complete_ Genome
GCF_001986065.1	Bordetella pertussis strain=I187	Complete_ Genome
GCF_001986085.1	Bordetella pertussis strain=I259	Complete_ Genome
GCF_001986105.1	Bordetella pertussis strain=I464	Complete_ Genome
GCF_001986155.1	Bordetella pertussis strain=H320	Complete_ Genome
GCF_001986175.1	Bordetella pertussis strain=H834	Complete_ Genome
GCF_001986195.1	Bordetella pertussis strain=H710	Complete_ Genome
GCF_001986215.1	Bordetella pertussis strain=H851	Complete_ Genome
GCF_001986235.1	Bordetella pertussis strain=H911	Complete_ Genome
GCF_001986255.1	Bordetella pertussis strain=H915	Complete_ Genome
GCF_001986275.1	Bordetella pertussis strain=I075	Complete_ Genome
GCF_001986295.1	Bordetella pertussis strain=I112	Complete_ Genome
GCF_001986315.1	Bordetella pertussis strain=I975	Complete_ Genome
GCF_001986335.1	Bordetella pertussis strain=I998	Complete_ Genome
GCF_001986355.1	Bordetella pertussis strain=J022	Complete_ Genome
GCF_001986375.1	Bordetella pertussis strain=C505	Complete_ Genome
GCF_001986415.1	Bordetella pertussis strain=C742	Complete_ Genome
GCF_001986435.1	Bordetella pertussis strain=D175	Complete_ Genome
GCF_001986455.1	Bordetella pertussis strain=D321	Complete_ Genome
GCF_001986475.1	Bordetella pertussis strain=D502	Complete_ Genome
GCF_001986495.1	Bordetella pertussis strain=E024	Complete_ Genome
GCF_001986515.1	Bordetella pertussis strain=E530	Complete_ Genome
GCF_001986535.1	Bordetella pertussis strain=H346	Complete_ Genome
GCF_001986555.1	Bordetella pertussis strain=H437	Complete_ Genome
GCF_001986575.1	Bordetella pertussis strain=H762	Complete_ Genome
GCF_001986595.1	Bordetella pertussis strain=H763	Complete_ Genome
GCF_001986615.1	Bordetella pertussis strain=H764	Complete_ Genome
GCF_001986635.1	Bordetella pertussis strain=H766	Complete_ Genome
GCF_001986655.1	Bordetella pertussis strain=H768	Complete_ Genome
GCF_001986675.1	Bordetella pertussis strain=H773	Complete_ Genome
GCF_001986695.1	Bordetella pertussis strain=H775	Complete_ Genome
GCF_001986715.1	Bordetella pertussis strain=H779	Complete_ Genome
GCF_001986735.1	Bordetella pertussis strain=H787	Complete_ Genome
GCF_001986755.1	Bordetella pertussis strain=H842	Complete_ Genome
GCF_001986775.1	Bordetella pertussis strain=H847	Complete_ Genome
GCF_001986795.1	Bordetella pertussis strain=H849	Complete_ Genome
GCF_001986815.1	Bordetella pertussis strain=H853	Complete_ Genome
GCF_001986835.1	Bordetella pertussis strain=H864	Complete_ Genome
GCF_001986855.1	Bordetella pertussis strain=H866	Complete_ Genome
GCF_001986875.1	Bordetella pertussis strain=H878	Complete_ Genome
GCF_001986895.1	Bordetella pertussis strain=H883	Complete_ Genome
GCF_001986915.1	Bordetella pertussis strain=H884	Complete_ Genome
GCF_001986935.1	Bordetella pertussis strain=H910	Complete_ Genome
GCF_001986955.1	Bordetella pertussis strain=I069	Complete_ Genome
GCF_001986975.1	Bordetella pertussis strain=I088	Complete_ Genome
GCF_001986995.1	Bordetella pertussis strain=I089	Complete_ Genome
GCF_001987015.1	Bordetella pertussis strain=I110	Complete_ Genome
GCF_001987035.1	Bordetella pertussis strain=I111	Complete_ Genome
GCF_001987055.1	Bordetella pertussis strain=I113	Complete_ Genome
GCF_001987075.1	Bordetella pertussis strain=I127	Complete_ Genome
GCF_001987095.1	Bordetella pertussis strain=I135	Complete_ Genome
GCF_001987115.1	Bordetella pertussis strain=I136	Complete_ Genome
GCF_001987135.1	Bordetella pertussis strain=I257	Complete_ Genome
GCF_001987155.1	Bordetella pertussis strain=I263	Complete_ Genome
GCF_001987175.1	Bordetella pertussis strain=I270	Complete_ Genome
GCF_001987195.1	Bordetella pertussis strain=I271	Complete_ Genome
GCF_001987215.1	Bordetella pertussis strain=I273	Complete_ Genome
GCF_001987235.1	Bordetella pertussis strain=I289	Complete_ Genome
GCF_001987255.1	Bordetella pertussis strain=I315	Complete_ Genome
GCF_001987275.1	Bordetella pertussis strain=I318	Complete_ Genome
GCF_001987295.1	Bordetella pertussis strain=I331	Complete_ Genome
GCF_001987315.1	Bordetella pertussis strain=I350	Complete_ Genome
GCF_001987335.1	Bordetella pertussis strain=I375	Complete_ Genome
GCF_001987355.1	Bordetella pertussis strain=I379	Complete_ Genome
GCF_001987375.1	Bordetella pertussis strain=I380	Complete_ Genome
GCF_001987395.1	Bordetella pertussis strain=I382	Complete_ Genome
GCF_001987415.1	Bordetella pertussis strain=I386	Complete_ Genome
GCF_001987435.1	Bordetella pertussis strain=I452	Complete_ Genome
GCF_001987455.1	Bordetella pertussis strain=I461	Complete_ Genome
GCF_001987475.1	Bordetella pertussis strain=I728	Complete_ Genome
GCF_001987495.1	Bordetella pertussis strain=I735	Complete_ Genome
GCF_001987515.1	Bordetella pertussis strain=I754	Complete_ Genome
GCF_001987535.1	Bordetella pertussis strain=I755	Complete_ Genome
GCF_001987555.1	Bordetella pertussis strain=I762	Complete_ Genome
GCF_001987575.1	Bordetella pertussis strain=I959	Complete_ Genome
GCF_001987595.1	Bordetella pertussis strain=I965	Complete_ Genome
GCF_001987615.1	Bordetella pertussis strain=I968	Complete_ Genome
GCF_001987635.1	Bordetella pertussis strain=I977	Complete_ Genome
GCF_001987655.1	Bordetella pertussis strain=I978	Complete_ Genome
GCF_001987675.1	Bordetella pertussis strain=J012	Complete_ Genome
GCF_001987695.1	Bordetella pertussis strain=J016	Complete_ Genome
GCF_001987715.1	Bordetella pertussis strain=J019	Complete_ Genome
GCF_001987735.1	Bordetella pertussis strain=J021	Complete_ Genome
GCF_001987755.1	Bordetella pertussis strain=J023	Complete_ Genome
GCF_001987775.1	Bordetella pertussis strain=J027	Complete_ Genome
GCF_001987795.1	Bordetella pertussis strain=J030	Complete_ Genome
GCF_001987815.1	Bordetella pertussis strain=J039	Complete_ Genome
GCF_001987835.1	Bordetella pertussis strain=J068	Complete_ Genome
GCF_001987855.1	Bordetella pertussis strain=J072	Complete_ Genome
GCF_001987875.1	Bordetella pertussis strain=J073	Complete_ Genome
GCF_001987895.1	Bordetella pertussis strain=J076	Complete_ Genome
GCF_001987915.1	Bordetella pertussis strain=J090	Complete_ Genome
GCF_001987935.1	Bordetella pertussis strain=J091	Complete_ Genome
GCF_001987955.1	Bordetella pertussis strain=J098	Complete_ Genome
GCF_001987975.1	Bordetella pertussis strain=J100	Complete_ Genome
GCF_001987995.1	Bordetella pertussis strain=J110	Complete_ Genome
GCF_001988015.1	Bordetella pertussis strain=J115	Complete_ Genome
GCF_001988035.1	Bordetella pertussis strain=B201	Complete_ Genome
GCF_001988055.1	Bordetella pertussis strain=B227	Complete_ Genome
GCF_001988075.1	Bordetella pertussis strain=C549	Complete_ Genome
GCF_001988095.1	Bordetella pertussis strain=C734	Complete_ Genome
GCF_001988115.1	Bordetella pertussis strain=C757	Complete_ Genome
GCF_001988135.1	Bordetella pertussis strain=E194	Complete_ Genome
GCF_001988155.1	Bordetella pertussis strain=E602	Complete_ Genome
GCF_001988175.1	Bordetella pertussis strain=H382	Complete_ Genome
GCF_001988195.1	Bordetella pertussis strain=H682	Complete_ Genome
GCF_001988215.1	Bordetella pertussis strain=H698	Complete_ Genome
GCF_001988235.1	Bordetella pertussis strain=H706	Complete_ Genome
GCF_001988255.1	Bordetella pertussis strain=H730	Complete_ Genome
GCF_001988275.1	Bordetella pertussis strain=H771	Complete_ Genome
GCF_001988295.1	Bordetella pertussis strain=J178	Complete_ Genome
GCF_001988315.1	Bordetella pertussis strain=J179	Complete_ Genome
GCF_001988335.1	Bordetella pertussis strain=J191	Complete_ Genome
GCF_001988355.1	Bordetella pertussis strain=J192	Complete_ Genome
GCF_001988375.1	Bordetella pertussis strain=J193	Complete_ Genome
GCF_001988395.1	Bordetella pertussis strain=J194	Complete_ Genome
GCF_001988415.1	Bordetella pertussis strain=J197	Complete_ Genome
GCF_001988435.1	Bordetella pertussis strain=J201	Complete_ Genome
GCF_001988455.1	Bordetella pertussis strain=J225	Complete_ Genome
GCF_001988475.1	Bordetella pertussis strain=J296	Complete_ Genome
GCF_001988495.1	Bordetella pertussis strain=J300	Complete_ Genome
GCF_001988515.1	Bordetella pertussis strain=J305	Complete_ Genome
GCF_001988535.1	Bordetella pertussis strain=J311	Complete_ Genome
GCF_001988555.1	Bordetella pertussis strain=C975	Complete_ Genome
GCF_001988575.1	Bordetella pertussis strain=E368	Complete_ Genome
GCF_001988595.1	Bordetella pertussis strain=F501	Complete_ Genome
GCF_001988615.1	Bordetella pertussis strain=F657	Complete_ Genome
GCF_001988635.1	Bordetella pertussis strain=F778	Complete_ Genome
GCF_001988655.1	Bordetella pertussis strain=F934	Complete_ Genome
GCF_001988675.1	Bordetella pertussis strain=G085	Complete_ Genome
GCF_001988695.1	Bordetella pertussis strain=G807	Complete_ Genome
GCF_001988715.1	Bordetella pertussis strain=G965	Complete_ Genome
GCF_001988735.1	Bordetella pertussis strain=H348	Complete_ Genome
GCF_001988755.1	Bordetella pertussis strain=H361	Complete_ Genome
GCF_001988775.1	Bordetella pertussis strain=H533	Complete_ Genome
GCF_001988795.1	Bordetella pertussis strain=H540	Complete_ Genome
GCF_001988815.1	Bordetella pertussis strain=H636	Complete_ Genome
GCF_001988835.1	Bordetella pertussis strain=H876	Complete_ Genome
GCF_001988855.1	Bordetella pertussis strain=I093	Complete_ Genome
GCF_001988875.1	Bordetella pertussis strain=J093	Complete_ Genome
GCF_001988895.1	Bordetella pertussis strain=J097	Complete_ Genome
GCF_001988915.1	Bordetella pertussis strain=J099	Complete_ Genome
GCF_001988995.1	Bordetella pertussis strain=J103	Complete_ Genome
GCF_001989015.1	Bordetella pertussis strain=J104	Complete_ Genome
GCF_001989035.1	Bordetella pertussis strain=J120	Complete_ Genome
GCF_001989055.1	Bordetella pertussis strain=J121	Complete_ Genome
GCF_001989075.1	Bordetella pertussis strain=J122	Complete_ Genome
GCF_001989095.1	Bordetella pertussis strain=J124	Complete_ Genome
GCF_001989115.1	Bordetella pertussis strain=J149	Complete_ Genome
GCF_001989135.1	Bordetella pertussis strain=J155	Complete_ Genome
GCF_001989155.1	Bordetella pertussis strain=J159	Complete_ Genome
GCF_001989175.1	Bordetella pertussis strain=J161	Complete_ Genome
GCF_001989195.1	Bordetella pertussis strain=J162	Complete_ Genome
GCF_001989215.1	Bordetella pertussis strain=J174	Complete_ Genome
GCF_001989235.1	Bordetella pertussis strain=J198	Complete_ Genome
GCF_001989255.1	Bordetella pertussis strain=J206	Complete_ Genome
GCF_001989275.1	Bordetella pertussis strain=J208	Complete_ Genome
GCF_001989295.1	Bordetella pertussis strain=J210	Complete_ Genome
GCF_001989315.1	Bordetella pertussis strain=J277	Complete_ Genome
GCF_001989335.1	Bordetella pertussis strain=J096	Complete_ Genome
GCF_000070465.1	Bordetella avium 197N	Complete_ Genome
GCF_000016725.1	Acidiphilium cryptum JF-5 strain=JF-5	Complete_ Genome
GCF_000017405.1	Ochrobactrum anthropi ATCC 49188 strain=ATCC 49188	Complete_ Genome
GCF_000742955.1	Ochrobactrum anthropi strain=OAB	Complete_ Genome
GCF_000019845.1	Beijerinckia indica subsp. indica ATCC 9039 strain=ATCC 9039	Complete_ Genome
GCF_000007705.1	Chromobacterium violaceum ATCC 12472 strain=ATCC 12472	Complete_ Genome
GCF_000007105.1	Zymomonas mobilis subsp. mobilis ZM4 = ATCC 31821 strain=ZM4	Complete_ Genome
GCF_000024245.1	Zymomonas mobilis subsp. mobilis NCIMB 11163 strain=NCIB 11163	Complete_ Genome
GCF_000175255.2	Zymomonas mobilis subsp. mobilis ATCC 10988 strain=ATCC 10988	Complete_ Genome
GCF_000218875.1	Zymomonas mobilis subsp. pomaceae ATCC 29192 strain=ATCC 29192	Complete_ Genome
GCF_000277755.1	Zymomonas mobilis subsp. mobilis ATCC 29191 strain=ATCC 29191	Complete_ Genome
GCF_000498655.1	Zymomonas mobilis subsp. mobilis str. CP4 = NRRL B-14023 strain=CP4 = NRRL B-14023	Complete_ Genome
GCF_000576125.1	Zymomonas mobilis subsp. mobilis NRRL B-12526 strain=NRRL B-12526	Complete_ Genome
GCF_000576165.1	Zymomonas mobilis subsp. mobilis str. CP4 = NRRL B-14023 strain=CP4 = NRRL B-14023	Complete_ Genome
GCF_000018045.1	Citrobacter koseri ATCC BAA-895 strain=ATCC BAA-895	Complete_ Genome
GCF_000648515.1	Citrobacter freundii CFNIH1 strain=CFNIH1	Complete_ Genome
GCF_001022155.1	Citrobacter freundii strain=CAV1321	Complete_ Genome
GCF_001022275.1	Citrobacter freundii strain=CAV1741	Complete_ Genome
GCF_001281005.1	Citrobacter freundii strain=P10159	Complete_ Genome
GCF_001702455.1	Citrobacter freundii strain=B38	Complete_ Genome
GCF_001718055.1	Citrobacter freundii strain=SL151	Complete_ Genome
GCF_000215745.1	Enterobacter aerogenes KCTC 2190 strain=KCTC 2190	Complete_ Genome
GCF_000334515.1	Enterobacter aerogenes EA1509E strain=EA1509E	Complete_ Genome
GCF_001021995.1	[Enterobacter] aerogenes strain=CAV1320	Complete_ Genome
GCF_001559215.1	[Enterobacter] aerogenes strain=FDAARGOS_152	Complete_ Genome
GCF_001571545.2	[Enterobacter] aerogenes strain=G7 G7	Complete_ Genome
GCF_001593585.1	[Enterobacter] aerogenes strain=FDAARGOS_139	Complete_ Genome
GCF_001558735.1	Pantoea agglomerans strain=FDAARGOS_160	Complete_ Genome
GCF_001709315.1	Pantoea agglomerans strain=C410P1	Complete_ Genome
GCF_000025565.1	Enterobacter cloacae subsp. cloacae ATCC 13047 strain=ATCC 13047	Complete_ Genome
GCF_000235765.1	Enterobacter cloacae subsp. dissolvens SDM strain=SDM	Complete_ Genome
GCF_000239975.1	Enterobacter cloacae EcWSU1 strain=EcWSU1	Complete_ Genome
GCF_000286275.1	Enterobacter cloacae subsp. cloacae ENHKU01 strain=ENHKU01	Complete_ Genome
GCF_000512375.1	Enterobacter cloacae P101 strain=P101	Complete_ Genome
GCF_000724505.1	Enterobacter cloacae ECNIH2 strain=ECNIH2	Complete_ Genome
GCF_000770155.1	Enterobacter cloacae strain=GGT036	Complete_ Genome
GCF_000784865.1	Enterobacter cloacae strain=ECNIH4	Complete_ Genome
GCF_000784905.1	Enterobacter cloacae strain=ECNIH5	Complete_ Genome
GCF_001022015.1	Enterobacter cloacae strain=CAV1311	Complete_ Genome
GCF_001022055.1	Enterobacter cloacae strain=CAV1668	Complete_ Genome
GCF_001022075.1	Enterobacter cloacae strain=CAV1411	Complete_ Genome
GCF_001022255.1	Enterobacter cloacae strain=CAV1669	Complete_ Genome
GCF_001029645.1	Enterobacter cloacae strain=UW5	Complete_ Genome
GCF_001922365.1	Enterobacter cloacae strain=AR_0002	Complete_ Genome
GCF_000027205.1	Erwinia amylovora ATCC 49946 strain=ATCC 49946	Complete_ Genome
GCF_000091565.1	Erwinia amylovora CFBP1430	Complete_ Genome
GCF_000025405.2	Pantoea ananatis LMG 20103 strain=LMG 20103	Complete_ Genome
GCF_000233595.1	Pantoea ananatis PA13 strain=PA13	Complete_ Genome
GCF_000270125.2	Pantoea ananatis AJ13355 strain=AJ13355	Complete_ Genome
GCF_000283875.1	Pantoea ananatis LMG 5342 strain=LMG 5342	Complete_ Genome
GCF_001543055.1	Pantoea ananatis strain=R100	Complete_ Genome
GCF_000023605.1	Pectobacterium carotovorum subsp. carotovorum PC1 strain=PC1	Complete_ Genome
GCF_000294535.1	Pectobacterium carotovorum subsp. carotovorum PCC21 strain=PCC21	Complete_ Genome
GCF_001932635.1	Pectobacterium carotovorum subsp. brasiliense strain=BC1	Complete_ Genome
GCF_000005845.2	Escherichia coli str. K-12 substr. MG1655 strain=K-12 substr. MG1655	Complete_ Genome
GCF_000007445.1	Escherichia coli CFT073 strain=CFT073	Complete_ Genome
GCF_000008865.1	Escherichia coli O157:H7 str. Sakai strain=Sakai substr. RIMD 0509952	Complete_ Genome
GCF_000009565.1	Escherichia coli BL21(DE3) strain=BL21(DE3)	Complete_ Genome
GCF_000010245.2	Escherichia coli str. K-12 substr. W3110 strain=K-12 substr. W3110	Complete_ Genome
GCF_000010385.1	Escherichia coli SE11 strain=SE11	Complete_ Genome
GCF_000010485.1	Escherichia coli SE15 strain=SE15	Complete_ Genome
GCF_000010745.1	Escherichia coli O103:H2 str. 12009 strain=12009	Complete_ Genome
GCF_000010765.1	Escherichia coli O111:H- str. 11128 strain=11128	Complete_ Genome
GCF_000013265.1	Escherichia coli UTI89 strain=UTI89	Complete_ Genome
GCF_000013305.1	Escherichia coli 536 strain=536	Complete_ Genome
GCF_000014845.1	Escherichia coli APEC O1 strain=APEC O1	Complete_ Genome
GCF_000017745.1	Escherichia coli O139:H28 str. E24377A strain=E24377A	Complete_ Genome
GCF_000017765.1	Escherichia coli HS strain=HS	Complete_ Genome
GCF_000017985.1	Escherichia coli B str. REL606 strain=REL606	Complete_ Genome
GCF_000019385.1	Escherichia coli ATCC 8739 strain=ATCC 8739	Complete_ Genome
GCF_000019425.1	Escherichia coli str. K-12 substr. DH10B strain=K-12 substr. DH10B	Complete_ Genome
GCF_000019645.1	Escherichia coli SMS-3-5 strain=SMS-3-5	Complete_ Genome
GCF_000021125.1	Escherichia coli O157:H7 str. EC4115 strain=EC4115	Complete_ Genome
GCF_000022225.1	Escherichia coli O157:H7 str. TW14359 strain=TW14359	Complete_ Genome
GCF_000022345.1	Escherichia coli BW2952 strain=K-12 substr. BW2952	Complete_ Genome
GCF_000022665.1	Escherichia coli BL21(DE3) strain=BL21(DE3)	Complete_ Genome
GCF_000023365.1	Escherichia coli DH1 strain=DH1	Complete_ Genome
GCF_000023665.1	Escherichia coli 'BL21-Gold(DE3)pLysS AG' strain=BL21-Gold(DE3)pLysS AG	Complete_ Genome
GCF_000025165.1	Escherichia coli O55:H7 str. CB9615 strain=CB9615	Complete_ Genome
GCF_000025745.1	Escherichia coli IHE3034 strain=IHE3034	Complete_ Genome
GCF_000026245.1	Escherichia coli 55989 strain=55989	Complete_ Genome
GCF_000026265.1	Escherichia coli IAI1 strain=IAI1	Complete_ Genome
GCF_000026345.1	Escherichia coli IAI39 strain=IAI39	Complete_ Genome
GCF_000026545.1	Escherichia coli O127:H6 str. E2348/69 strain=E2348/69	Complete_ Genome
GCF_000027125.1	Escherichia coli 042 strain=042	Complete_ Genome
GCF_000091005.1	Escherichia coli O26:H11 str. 11368 strain=11368	Complete_ Genome
GCF_000147855.2	Escherichia coli KO11FL strain=KO11	Complete_ Genome
GCF_000148365.1	Escherichia coli ABU 83972 strain=ABU 83972	Complete_ Genome
GCF_000148605.1	Escherichia coli UM146 strain=UM146	Complete_ Genome
GCF_000183345.1	Escherichia coli O83:H1 str. NRG 857C strain=NRG 857C	Complete_ Genome
GCF_000184185.1	Escherichia coli W strain=W	Complete_ Genome
GCF_000210475.1	Escherichia coli ETEC H10407 strain=ETEC H10407	Complete_ Genome
GCF_000212715.2	Escherichia coli UMNK88 strain=UMNK88	Complete_ Genome
GCF_000219515.2	Escherichia coli PCN033 strain=PCN033	Complete_ Genome
GCF_000227625.1	Escherichia coli O7:K1 str. CE10 strain=CE10	Complete_ Genome
GCF_000233875.1	Escherichia coli str. 'clone D i2' strain=clone D i2	Complete_ Genome
GCF_000233895.1	Escherichia coli str. 'clone D i14' strain=clone D i14	Complete_ Genome
GCF_000245515.1	Escherichia coli O55:H7 str. RM12579 strain=RM12579	Complete_ Genome
GCF_000257275.1	Escherichia coli P12b strain=P12b	Complete_ Genome
GCF_000258025.1	Escherichia coli KO11FL strain=KO11FL	Complete_ Genome
GCF_000258145.1	Escherichia coli W strain=W	Complete_ Genome
GCF_000262125.1	Escherichia coli Xuzhou21 strain=Xuzhou21	Complete_ Genome
GCF_000270105.1	Escherichia coli DH1 strain=DH1	Complete_ Genome
GCF_000284495.1	Escherichia coli LF82 strain=LF82	Complete_ Genome
GCF_000285655.3	Escherichia coli O25b:H4-ST131 strain=EC958	Complete_ Genome
GCF_000299255.1	Escherichia coli O104:H4 str. 2009EL-2050 strain=2009EL-2050	Complete_ Genome
GCF_000299455.1	Escherichia coli O104:H4 str. 2011C-3493 strain=2011C-3493	Complete_ Genome
GCF_000299475.1	Escherichia coli O104:H4 str. 2009EL-2071 strain=2009EL-2071	Complete_ Genome
GCF_000332755.1	Escherichia coli APEC O78 strain=APEC O78	Complete_ Genome
GCF_000350185.1	Escherichia coli str. K-12 substr. MDS42 strain=K-12 substr. MDS42	Complete_ Genome
GCF_000468515.1	Escherichia coli LY180 strain=LY180	Complete_ Genome
GCF_000493755.1	Escherichia coli JJ1886 strain=JJ1886	Complete_ Genome
GCF_000499485.1	Escherichia coli str. K-12 substr. MC4100 strain=K-12 substr. MC4100	Complete_ Genome
GCF_000520035.1	Escherichia coli O145:H28 str. RM13514 strain=RM13514	Complete_ Genome
GCF_000520055.1	Escherichia coli O145:H28 str. RM13516 strain=RM13516	Complete_ Genome
GCF_000597845.1	Escherichia coli strain=ST540	Complete_ Genome
GCF_000599625.1	Escherichia coli strain=ST540	Complete_ Genome
GCF_000599645.1	Escherichia coli strain=ST540	Complete_ Genome
GCF_000599665.1	Escherichia coli strain=ST2747	Complete_ Genome
GCF_000599685.1	Escherichia coli strain=ST2747	Complete_ Genome
GCF_000599705.1	Escherichia coli strain=ST2747	Complete_ Genome
GCF_000662395.1	Escherichia coli O145:H28 str. RM12761 strain=RM12761	Complete_ Genome
GCF_000671295.1	Escherichia coli O145:H28 str. RM12581 strain=RM12581	Complete_ Genome
GCF_000714595.1	Escherichia coli Nissle 1917 strain=Nissle 1917	Complete_ Genome
GCF_000725305.1	Escherichia coli KLY strain=KLY	Complete_ Genome
GCF_000730345.1	Escherichia coli O157:H7 str. SS17 strain=SS17	Complete_ Genome
GCF_000732965.1	Escherichia coli O157:H7 str. EDL933 strain=EDL933	Complete_ Genome
GCF_000743255.1	Escherichia coli ATCC 25922 strain=ATCC 25922	Complete_ Genome
GCF_000750555.1	Escherichia coli BW25113 strain=K-12 substr. BW25113	Complete_ Genome
GCF_000784925.1	Escherichia coli strain=ECONIH1	Complete_ Genome
GCF_000800215.1	Escherichia coli ER2796 strain=ER2796	Complete_ Genome
GCF_000800765.1	Escherichia coli K-12 strain=ER3413	Complete_ Genome
GCF_000800845.1	Escherichia coli RS218 strain=RS218	Complete_ Genome
GCF_000801165.1	Escherichia coli strain=RM9387	Complete_ Genome
GCF_000801185.2	Escherichia coli strain=94-3024	Complete_ Genome
GCF_000801205.1	Escherichia coli str. K-12 substr. MG1655 strain=K-12 substr. MG1655	Complete_ Genome
GCF_000803705.1	Escherichia coli O157:H7 str. SS52 strain=SS52	Complete_ Genome
GCF_000813165.1	Escherichia coli APEC IMT5155 strain=APEC IMT5155	Complete_ Genome
GCF_000814145.2	Escherichia coli strain=6409	Complete_ Genome
GCF_000819645.1	Escherichia coli	Complete_ Genome
GCF_000827105.1	Escherichia coli O157:H16 strain=Santai	Complete_ Genome
GCF_000829985.1	Escherichia coli 1303 strain=1303	Complete_ Genome
GCF_000830035.1	Escherichia coli strain=C41(DE3)	Complete_ Genome
GCF_000831565.1	Escherichia coli ECC-1470 strain=ECC-1470	Complete_ Genome
GCF_000833145.1	Escherichia coli strain=BL21 (TaKaRa)	Complete_ Genome
GCF_000931565.1	Escherichia coli strain=MNCRE44	Complete_ Genome
GCF_000952955.1	Escherichia coli strain=K-12 substr. RV308	Complete_ Genome
GCF_000953515.1	Escherichia coli strain=K-12 substr. HMS174	Complete_ Genome
GCF_000967155.2	Escherichia coli	Complete_ Genome
GCF_000968515.1	Escherichia coli VR50 strain=VR50	Complete_ Genome
GCF_000971615.1	Escherichia coli strain=CI5	Complete_ Genome
GCF_000974405.1	Escherichia coli K-12 strain=ER3454	Complete_ Genome
GCF_000974465.1	Escherichia coli K-12 strain=ER3440	Complete_ Genome
GCF_000974505.1	Escherichia coli K-12 strain=ER3476	Complete_ Genome
GCF_000974535.1	Escherichia coli K-12 strain=ER3445	Complete_ Genome
GCF_000974575.1	Escherichia coli K-12 strain=ER3466	Complete_ Genome
GCF_000974825.1	Escherichia coli K-12 strain=ER3446	Complete_ Genome
GCF_000974865.1	Escherichia coli K-12 strain=ER3475	Complete_ Genome
GCF_000974885.1	Escherichia coli K-12 strain=ER3435	Complete_ Genome
GCF_000981485.1	Escherichia coli K-12 strain=K-12 substr. AG100	Complete_ Genome
GCF_000986765.1	Escherichia coli O104:H4 str. C227-11 strain=C227-11 368 shch	Complete_ Genome
GCF_000987875.1	Escherichia coli strain=SEC470	Complete_ Genome
GCF_000988355.1	Escherichia coli strain=SQ37	Complete_ Genome
GCF_000988385.1	Escherichia coli strain=SQ88	Complete_ Genome
GCF_000988465.1	Escherichia coli strain=SQ2203	Complete_ Genome
GCF_001007915.1	Escherichia coli strain=CFSAN029787	Complete_ Genome
GCF_001020945.2	Escherichia coli K-12 strain=K-12 substr. GM4792	Complete_ Genome
GCF_001021005.2	Escherichia coli K-12 strain=K-12 substr. GM4792	Complete_ Genome
GCF_001029125.1	Escherichia coli PCN061 strain=PCN061	Complete_ Genome
GCF_001039415.1	Escherichia coli strain=C43(DE3)	Complete_ Genome
GCF_001043215.1	Escherichia coli strain=NCM3722 K-12	Complete_ Genome
GCF_001051135.1	Escherichia coli ACN001 strain=ACN001	Complete_ Genome
GCF_001183645.1	Escherichia coli strain=DH1Ec095	Complete_ Genome
GCF_001183665.1	Escherichia coli strain=DH1Ec104	Complete_ Genome
GCF_001183685.1	Escherichia coli strain=DH1Ec169	Complete_ Genome
GCF_001276585.2	Escherichia coli strain=RR1	Complete_ Genome
GCF_001280325.1	Escherichia coli strain=SF-088	Complete_ Genome
GCF_001280345.1	Escherichia coli strain=SF-468	Complete_ Genome
GCF_001280385.1	Escherichia coli strain=SF-166	Complete_ Genome
GCF_001280405.1	Escherichia coli strain=SF-173	Complete_ Genome
GCF_001307215.1	Escherichia coli O157:H7 strain=WS4202 laboratory strain	Complete_ Genome
GCF_001308065.1	Escherichia coli str. K-12 substr. MG1655 strain=K-12 substr. MG1655	Complete_ Genome
GCF_001308125.1	Escherichia coli strain=K-12 substr. MG1655_TMP32XR1	Complete_ Genome
GCF_001308165.1	Escherichia coli strain=K-12 substr. MG1655_TMP32XR2	Complete_ Genome
GCF_001420935.1	Escherichia coli strain=2012C-4227	Complete_ Genome
GCF_001420955.1	Escherichia coli strain=2009C-3133	Complete_ Genome
GCF_001442495.1	Escherichia coli strain=YD786	Complete_ Genome
GCF_001455385.1	Escherichia coli strain=CQSW20	Complete_ Genome
GCF_001469815.1	Escherichia coli strain=uk_P46212	Complete_ Genome
GCF_001485455.1	Escherichia coli strain=ST648 Pleural Effusion of Patients with Empyema Thoracis	Complete_ Genome
GCF_001513615.1	Escherichia coli strain=CD306	Complete_ Genome
GCF_001513635.1	Escherichia coli strain=JJ2434	Complete_ Genome
GCF_001515725.1	Escherichia coli strain=ACN002	Complete_ Genome
GCF_001542675.2	Escherichia coli strain=MRE600	Complete_ Genome
GCF_001544635.1	Escherichia coli str. K-12 substr. MG1655 strain=K-12 substr. MG1655	Complete_ Genome
GCF_001558995.2	Escherichia coli O157:H7 strain=JEONG-1266	Complete_ Genome
GCF_001559615.2	Escherichia coli B strain=C2566	Complete_ Genome
GCF_001559635.1	Escherichia coli B strain=C3029	Complete_ Genome
GCF_001559655.1	Escherichia coli K-12 strain=DHB4	Complete_ Genome
GCF_001559675.1	Escherichia coli K-12 strain=C3026	Complete_ Genome
GCF_001566335.1	Escherichia coli str. K-12 substr. MG1655 strain=JW5437-1 substr. MG1655	Complete_ Genome
GCF_001566615.1	Escherichia coli strain=SaT040	Complete_ Genome
GCF_001566635.1	Escherichia coli strain=G749	Complete_ Genome
GCF_001566655.1	Escherichia coli strain=MVAST0167	Complete_ Genome
GCF_001566675.1	Escherichia coli strain=ZH193	Complete_ Genome
GCF_001577325.1	Escherichia coli strain=ZH063	Complete_ Genome
GCF_001593565.1	Escherichia coli JJ1887 strain=JJ1887	Complete_ Genome
GCF_001610755.1	Escherichia coli str. Sanji strain=Sanji	Complete_ Genome
GCF_001612475.1	Escherichia coli strain=28RC1	Complete_ Genome
GCF_001612495.1	Escherichia coli strain=SRCC 1675	Complete_ Genome
GCF_001617565.1	Escherichia coli strain=Ecol_732	Complete_ Genome
GCF_001618325.1	Escherichia coli strain=Ecol_743	Complete_ Genome
GCF_001618345.2	Escherichia coli strain=Ecol_745	Complete_ Genome
GCF_001618365.1	Escherichia coli strain=Ecol_448	Complete_ Genome
GCF_001644725.1	Escherichia coli strain=2011C-3911	Complete_ Genome
GCF_001644745.1	Escherichia coli strain=2013C-4465	Complete_ Genome
GCF_001650275.1	Escherichia coli O157 strain=180-PT54	Complete_ Genome
GCF_001650295.1	Escherichia coli O157 strain=644-PT8	Complete_ Genome
GCF_001651925.1	Escherichia coli O157:H7 strain=FRIK2069	Complete_ Genome
GCF_001651945.1	Escherichia coli O157:H7 strain=FRIK2533	Complete_ Genome
GCF_001651965.1	Escherichia coli O157:H7 strain=FRIK2455	Complete_ Genome
GCF_001660565.1	Escherichia coli strain=S51	Complete_ Genome
GCF_001660585.1	Escherichia coli strain=NGF1	Complete_ Genome
GCF_001663075.1	Escherichia coli strain=ER1821R	Complete_ Genome
GCF_001663475.1	Escherichia coli strain=Eco889	Complete_ Genome
GCF_001675145.1	Escherichia coli strain=ECONIH2	Complete_ Genome
GCF_001677475.1	Escherichia coli strain=06-00048 CFSAN004178	Complete_ Genome
GCF_001677495.1	Escherichia coli strain=09-00049	Complete_ Genome
GCF_001677515.1	Escherichia coli strain=08-00022	Complete_ Genome
GCF_001678925.1	Escherichia coli strain=H1827/12	Complete_ Genome
GCF_001678965.1	Escherichia coli strain=GB089	Complete_ Genome
GCF_001679985.1	Escherichia coli strain=210205630 210205630	Complete_ Genome
GCF_001682305.1	Escherichia coli strain=EC590	Complete_ Genome
GCF_001683435.1	Escherichia coli strain=K-15KW01	Complete_ Genome
GCF_001693315.1	Escherichia coli strain=UPEC 26-1	Complete_ Genome
GCF_001693635.1	Escherichia coli strain=O177:H21 asymptomatic colonization	Complete_ Genome
GCF_001695515.1	Escherichia coli O157:H7 strain=FRIK944	Complete_ Genome
GCF_001721125.1	Escherichia coli strain=FORC_028	Complete_ Genome
GCF_001721205.1	Escherichia coli strain=CFSAN004177	Complete_ Genome
GCF_001721225.1	Escherichia coli strain=CFSAN004176	Complete_ Genome
GCF_001721525.1	Escherichia coli strain=MS6198	Complete_ Genome
GCF_001723505.1	Escherichia coli strain=K-12 NEB 5-alpha	Complete_ Genome
GCF_001735705.1	Escherichia coli strain=210221272	Complete_ Genome
GCF_001750845.1	Escherichia coli strain=FORC_031	Complete_ Genome
GCF_001753445.1	Escherichia coli O157:H7 strain=1130	Complete_ Genome
GCF_001753465.1	Escherichia coli O157:H7 strain=2149	Complete_ Genome
GCF_001753485.1	Escherichia coli O157:H7 strain=8368	Complete_ Genome
GCF_001753505.1	Escherichia coli O157:H7 strain=2159	Complete_ Genome
GCF_001753525.1	Escherichia coli O157:H7 strain=9234	Complete_ Genome
GCF_001753545.1	Escherichia coli O157:H7 strain=3384	Complete_ Genome
GCF_001753565.1	Escherichia coli O157:H7 strain=4276	Complete_ Genome
GCF_001806265.1	Escherichia coli strain=NADC 5570/86-24/6565 mutant	Complete_ Genome
GCF_001806285.1	Escherichia coli strain=NADC 5570/86-24/6564 wild type	Complete_ Genome
GCF_001860505.1	Escherichia coli strain=Y5	Complete_ Genome
GCF_001865295.1	Escherichia coli strain=PA20	Complete_ Genome
GCF_001886535.1	Escherichia coli strain=MRSN352231	Complete_ Genome
GCF_001886555.1	Escherichia coli strain=MRSN346638	Complete_ Genome
GCF_001886575.1	Escherichia coli strain=MRSN346355	Complete_ Genome
GCF_001886755.1	Escherichia coli strain=MRSN346595	Complete_ Genome
GCF_001886935.1	Escherichia coli strain=FORC_041	Complete_ Genome
GCF_001888075.1	Escherichia coli strain=FMU073332	Complete_ Genome
GCF_001890205.1	Escherichia coli strain=155	Complete_ Genome
GCF_001890225.1	Escherichia coli strain=272	Complete_ Genome
GCF_001890245.1	Escherichia coli strain=472	Complete_ Genome
GCF_001890265.1	Escherichia coli strain=350	Complete_ Genome
GCF_001890285.1	Escherichia coli strain=9000	Complete_ Genome
GCF_001890305.1	Escherichia coli strain=7784	Complete_ Genome
GCF_001890325.1	Escherichia coli strain=319	Complete_ Genome
GCF_001890345.1	Escherichia coli strain=10671	Complete_ Genome
GCF_001890365.1	Escherichia coli strain=MRSN346647	Complete_ Genome
GCF_001900295.1	Escherichia coli strain=C1	Complete_ Genome
GCF_001900315.1	Escherichia coli strain=C4	Complete_ Genome
GCF_001900335.1	Escherichia coli strain=C10	Complete_ Genome
GCF_001900355.1	Escherichia coli strain=C11	Complete_ Genome
GCF_001900375.1	Escherichia coli strain=D7	Complete_ Genome
GCF_001900395.1	Escherichia coli strain=D8	Complete_ Genome
GCF_001900415.1	Escherichia coli strain=H5	Complete_ Genome
GCF_001900435.1	Escherichia coli strain=H6	Complete_ Genome
GCF_001900455.1	Escherichia coli strain=H7	Complete_ Genome
GCF_001900475.1	Escherichia coli strain=H10	Complete_ Genome
GCF_001900495.1	Escherichia coli strain=C2	Complete_ Genome
GCF_001900515.1	Escherichia coli strain=C3	Complete_ Genome
GCF_001900535.1	Escherichia coli strain=C5	Complete_ Genome
GCF_001900555.1	Escherichia coli strain=C8	Complete_ Genome
GCF_001900575.1	Escherichia coli strain=C9	Complete_ Genome
GCF_001900595.1	Escherichia coli strain=D1	Complete_ Genome
GCF_001900615.1	Escherichia coli strain=D2	Complete_ Genome
GCF_001900635.1	Escherichia coli strain=D3	Complete_ Genome
GCF_001900655.1	Escherichia coli strain=D4	Complete_ Genome
GCF_001900675.1	Escherichia coli strain=D5	Complete_ Genome
GCF_001900695.1	Escherichia coli strain=D6	Complete_ Genome
GCF_001900715.1	Escherichia coli strain=D9	Complete_ Genome
GCF_001900735.1	Escherichia coli strain=D10	Complete_ Genome
GCF_001900775.1	Escherichia coli strain=H1	Complete_ Genome
GCF_001900795.1	Escherichia coli strain=H2	Complete_ Genome
GCF_001900815.1	Escherichia coli strain=H3	Complete_ Genome
GCF_001900835.1	Escherichia coli strain=H8	Complete_ Genome
GCF_001900885.1	Escherichia coli strain=H14	Complete_ Genome
GCF_001900905.1	Escherichia coli strain=S3	Complete_ Genome
GCF_001900925.1	Escherichia coli strain=S21	Complete_ Genome
GCF_001900945.1	Escherichia coli strain=S40	Complete_ Genome
GCF_001900965.1	Escherichia coli strain=S42	Complete_ Genome
GCF_001900985.1	Escherichia coli strain=S43	Complete_ Genome
GCF_001901005.1	Escherichia coli strain=H15	Complete_ Genome
GCF_001901025.1	Escherichia coli strain=M1	Complete_ Genome
GCF_001901045.1	Escherichia coli strain=M3	Complete_ Genome
GCF_001901065.1	Escherichia coli strain=M6	Complete_ Genome
GCF_001901085.1	Escherichia coli strain=M8	Complete_ Genome
GCF_001901105.1	Escherichia coli strain=M9	Complete_ Genome
GCF_001901125.1	Escherichia coli strain=M10	Complete_ Genome
GCF_001901145.1	Escherichia coli strain=M11	Complete_ Genome
GCF_001901165.1	Escherichia coli strain=M15	Complete_ Genome
GCF_001901185.1	Escherichia coli strain=M18	Complete_ Genome
GCF_001901215.1	Escherichia coli strain=M19	Complete_ Genome
GCF_001901315.1	Escherichia coli strain=S1	Complete_ Genome
GCF_001901365.1	Escherichia coli strain=S30	Complete_ Genome
GCF_001901405.1	Escherichia coli strain=S50	Complete_ Genome
GCF_001901425.1	Escherichia coli strain=C7	Complete_ Genome
GCF_001901445.1	Escherichia coli strain=S56	Complete_ Genome
GCF_001901465.1	Escherichia coli strain=S10	Complete_ Genome
GCF_001932515.1	Escherichia coli strain=tolC-	Complete_ Genome
GCF_001936315.1	Escherichia coli strain=SLK172	Complete_ Genome
GCF_001938625.1	Escherichia coli strain=2016C-3936C1	Complete_ Genome
GCF_001969285.1	Escherichia coli strain=WCHEC1613	Complete_ Genome
GCF_001999185.1	Escherichia coli strain=MGY	Complete_ Genome
GCF_900092615.1	Escherichia coli NCTC86EC	Complete_ Genome
GCF_900096795.1	Escherichia coli 103	Complete_ Genome
GCF_900096845.1	Escherichia coli 106	Complete_ Genome
GCF_000262305.1	Shimwellia blattae DSM 4481 = NBRC 105725 strain=DSM 4481	Complete_ Genome
GCF_000026225.1	Escherichia fergusonii ATCC 35469	Complete_ Genome
GCF_000597785.2	Hafnia alvei FB1 strain=FB1	Complete_ Genome
GCF_001559255.1	Hafnia alvei strain=FDAARGOS_158	Complete_ Genome
GCF_001636255.1	Hafnia alvei strain=HUMV-5920	Complete_ Genome
GCF_000714655.1	Klebsiella oxytoca KONIH1 strain=KONIH1	Complete_ Genome
GCF_001022115.1	Klebsiella oxytoca strain=CAV1335	Complete_ Genome
GCF_001022195.1	Klebsiella oxytoca strain=CAV1374	Complete_ Genome
GCF_001022295.1	Klebsiella oxytoca strain=CAV1099	Complete_ Genome
GCF_001548355.1	Klebsiella oxytoca strain=JKo3	Complete_ Genome
GCF_001870185.1	Klebsiella oxytoca strain=CAV1015	Complete_ Genome
GCF_001970835.1	Klebsiella oxytoca strain=CAV1752	Complete_ Genome
GCF_000009885.1	Klebsiella pneumoniae subsp. pneumoniae NTUH-K2044 strain=NTUH-K2044	Complete_ Genome
GCF_000016305.1	Klebsiella pneumoniae subsp. pneumoniae MGH 78578 strain=ATCC 700721; MGH 78578	Complete_ Genome
GCF_000019565.1	Klebsiella pneumoniae 342 strain=342	Complete_ Genome
GCF_000220485.1	Klebsiella pneumoniae KCTC 2242 strain=KCTC 2242	Complete_ Genome
GCF_000240185.1	Klebsiella pneumoniae subsp. pneumoniae HS11286 strain=HS11286	Complete_ Genome
GCF_000281435.2	Klebsiella pneumoniae subsp. pneumoniae KPNIH10 strain=KPNIH10	Complete_ Genome
GCF_000281535.2	Klebsiella pneumoniae subsp. pneumoniae KPNIH1 strain=KPNIH1	Complete_ Genome
GCF_000294365.1	Klebsiella pneumoniae subsp. pneumoniae 1084 strain=1084	Complete_ Genome
GCF_000364385.3	Klebsiella pneumoniae strain=ATCC BAA-2146	Complete_ Genome
GCF_000406765.2	Klebsiella pneumoniae 500_1420 strain=500_1420	Complete_ Genome
GCF_000417085.2	Klebsiella pneumoniae UHKPC33 strain=UHKPC33	Complete_ Genome
GCF_000417225.2	Klebsiella pneumoniae DMC1097 strain=DMC1097	Complete_ Genome
GCF_000417265.2	Klebsiella pneumoniae UHKPC07 strain=UHKPC07	Complete_ Genome
GCF_000445405.1	Klebsiella pneumoniae JM45	Complete_ Genome
GCF_000465975.2	Klebsiella pneumoniae KP-1 strain=KP-1	Complete_ Genome
GCF_000474015.1	Klebsiella pneumoniae CG43 strain=CG43	Complete_ Genome
GCF_000512165.1	Klebsiella pneumoniae subsp. pneumoniae Kp13 strain=Kp13	Complete_ Genome
GCF_000597905.1	Klebsiella pneumoniae 30684/NJST258_2 strain=30684/NJST258_2	Complete_ Genome
GCF_000598005.1	Klebsiella pneumoniae 30660/NJST258_1 strain=30660/NJST258_1	Complete_ Genome
GCF_000695935.1	Klebsiella pneumoniae subsp. pneumoniae KPNIH27 strain=KPNIH27	Complete_ Genome
GCF_000714675.1	Klebsiella pneumoniae subsp. pneumoniae KPNIH24 strain=KPNIH24	Complete_ Genome
GCF_000717515.1	Klebsiella pneumoniae subsp. pneumoniae KPR0928 strain=KPR0928	Complete_ Genome
GCF_000733255.1	Klebsiella pneumoniae subsp. pneumoniae PittNDM01 strain=PittNDM01	Complete_ Genome
GCF_000739495.1	Klebsiella pneumoniae strain=blaNDM-1	Complete_ Genome
GCF_000742755.1	Klebsiella pneumoniae subsp. pneumoniae strain=ATCC 43816 KPPR1	Complete_ Genome
GCF_000764615.1	Klebsiella pneumoniae strain=PMK1	Complete_ Genome
GCF_000775375.1	Klebsiella pneumoniae subsp. pneumoniae strain=KPNIH33	Complete_ Genome
GCF_000775395.1	Klebsiella pneumoniae subsp. pneumoniae strain=KPNIH32	Complete_ Genome
GCF_000775955.1	Klebsiella pneumoniae strain=XH209	Complete_ Genome
GCF_000784945.1	Klebsiella pneumoniae subsp. pneumoniae strain=KPNIH29	Complete_ Genome
GCF_000784985.1	Klebsiella pneumoniae subsp. pneumoniae strain=KPNIH30	Complete_ Genome
GCF_000785005.1	Klebsiella pneumoniae subsp. pneumoniae strain=KPNIH31	Complete_ Genome
GCF_000807395.2	Klebsiella pneumoniae strain=32192	Complete_ Genome
GCF_000813205.1	Klebsiella pneumoniae HK787 strain=HK787	Complete_ Genome
GCF_000814305.1	Klebsiella pneumoniae strain=34618	Complete_ Genome
GCF_000814805.1	Klebsiella pneumoniae subsp. pneumoniae 1158 strain=1158	Complete_ Genome
GCF_000968155.1	Klebsiella pneumoniae strain=Kp52.145	Complete_ Genome
GCF_000981845.1	Klebsiella pneumoniae subsp. pneumoniae strain=234-12	Complete_ Genome
GCF_001022035.1	Klebsiella pneumoniae strain=CAV1392	Complete_ Genome
GCF_001022175.1	Klebsiella pneumoniae strain=CAV1344	Complete_ Genome
GCF_001022235.1	Klebsiella pneumoniae strain=CAV1596	Complete_ Genome
GCF_001280925.1	Klebsiella pneumoniae subsp. pneumoniae strain=HKUOPLC	Complete_ Genome
GCF_001307175.1	Klebsiella pneumoniae strain=KP617	Complete_ Genome
GCF_001455995.1	Klebsiella pneumoniae strain=MS6671	Complete_ Genome
GCF_001456055.3	Klebsiella pneumoniae strain=KpN01	Complete_ Genome
GCF_001456095.3	Klebsiella pneumoniae strain=KpN06	Complete_ Genome
GCF_001456135.1	Klebsiella pneumoniae strain=CAV1193	Complete_ Genome
GCF_001482345.1	Klebsiella pneumoniae strain=J1	Complete_ Genome
GCF_001521895.1	Klebsiella pneumoniae subsp. pneumoniae strain=NUHL24835	Complete_ Genome
GCF_001529935.1	Klebsiella pneumoniae subsp. pneumoniae strain=RJF999	Complete_ Genome
GCF_001530015.1	Klebsiella pneumoniae subsp. pneumoniae strain=RJF293	Complete_ Genome
GCF_001548315.1	Klebsiella pneumoniae strain=YH43	Complete_ Genome
GCF_001611055.1	Klebsiella pneumoniae subsp. pneumoniae strain=TGH8	Complete_ Genome
GCF_001611095.1	Klebsiella pneumoniae subsp. pneumoniae strain=TGH10	Complete_ Genome
GCF_001644765.1	Klebsiella pneumoniae strain=SKGH01	Complete_ Genome
GCF_001646625.1	Klebsiella pneumoniae strain=W14	Complete_ Genome
GCF_001648215.1	Klebsiella pneumoniae strain=AATZP	Complete_ Genome
GCF_001663195.1	Klebsiella pneumoniae strain=BR	Complete_ Genome
GCF_001663295.1	Klebsiella pneumoniae strain=KPNIH39	Complete_ Genome
GCF_001663435.1	Klebsiella pneumoniae strain=Kpn223	Complete_ Genome
GCF_001663455.1	Klebsiella pneumoniae strain=Kpn555	Complete_ Genome
GCF_001675125.1	Klebsiella pneumoniae strain=KPNIH36	Complete_ Genome
GCF_001676825.1	Klebsiella pneumoniae strain=TH1 TH1	Complete_ Genome
GCF_001704235.1	Klebsiella pneumoniae strain=DHQP1002001	Complete_ Genome
GCF_001705385.1	Klebsiella pneumoniae blood sample 2	Complete_ Genome
GCF_001708225.1	Klebsiella pneumoniae strain=ED23	Complete_ Genome
GCF_001708245.1	Klebsiella pneumoniae strain=ED2	Complete_ Genome
GCF_001709275.1	Klebsiella pneumoniae 11	Complete_ Genome
GCF_001709295.1	Klebsiella pneumoniae 23	Complete_ Genome
GCF_001721725.1	Klebsiella pneumoniae strain=UCLAOXA232KP_Pt0	Complete_ Genome
GCF_001741545.1	Klebsiella pneumoniae strain=UCLAOXA232KP	Complete_ Genome
GCF_001741665.1	Klebsiella pneumoniae strain=UCLAOXA232KP	Complete_ Genome
GCF_001746535.1	Klebsiella pneumoniae subsp. pneumoniae strain=TGH13	Complete_ Genome
GCF_001750805.1	Klebsiella pneumoniae strain=KP36	Complete_ Genome
GCF_001855315.1	Klebsiella pneumoniae strain=KP5	Complete_ Genome
GCF_001870165.1	Klebsiella pneumoniae strain=CAV1016	Complete_ Genome
GCF_001885255.2	Klebsiella pneumoniae strain=Kp_Goe_822579	Complete_ Genome
GCF_001902195.1	Klebsiella pneumoniae strain=MNCRE78	Complete_ Genome
GCF_001902215.1	Klebsiella pneumoniae strain=MNCRE69	Complete_ Genome
GCF_001902235.1	Klebsiella pneumoniae strain=MNCRE53	Complete_ Genome
GCF_001902255.1	Klebsiella pneumoniae strain=CAV1453	Complete_ Genome
GCF_001902335.1	Klebsiella pneumoniae Kp_Goe_154414	Complete_ Genome
GCF_001902355.1	Klebsiella pneumoniae strain=Kp_Goe_62629	Complete_ Genome
GCF_001902395.1	Klebsiella pneumoniae strain=Kp_Goe_39795	Complete_ Genome
GCF_001902415.1	Klebsiella pneumoniae strain=Kp_Goe_822917	Complete_ Genome
GCF_001902435.1	Klebsiella pneumoniae strain=Kp_Goe_33208	Complete_ Genome
GCF_001902475.1	Klebsiella pneumoniae strain=SWU01	Complete_ Genome
GCF_001902515.1	Klebsiella pneumoniae strain=Kp_Goe_71070	Complete_ Genome
GCF_001908515.1	Klebsiella pneumoniae strain=CAV1042	Complete_ Genome
GCF_001908595.1	Klebsiella pneumoniae strain=Kp_Goe_149473	Complete_ Genome
GCF_001908625.1	Klebsiella pneumoniae strain=Kp_Goe_827024	Complete_ Genome
GCF_001908655.1	Klebsiella pneumoniae strain=Kp_Goe_827026	Complete_ Genome
GCF_001908675.1	Klebsiella pneumoniae strain=Kp_Goe_152021	Complete_ Genome
GCF_001908695.1	Klebsiella pneumoniae strain=KP_Goe_828304	Complete_ Genome
GCF_001908875.1	Klebsiella pneumoniae strain=Kp_Goe_149832	Complete_ Genome
GCF_001908895.1	Klebsiella pneumoniae strain=Kp_Goe_821588	Complete_ Genome
GCF_001913175.1	Klebsiella pneumoniae strain=Kp_Goe_121641	Complete_ Genome
GCF_001922465.1	Klebsiella pneumoniae strain=AR_0049	Complete_ Genome
GCF_001936035.1	Klebsiella pneumoniae strain=ATCC 35657	Complete_ Genome
GCF_001952835.1	Klebsiella pneumoniae strain=1756	Complete_ Genome
GCF_001952875.1	Klebsiella pneumoniae strain=CN1	Complete_ Genome
GCF_001952895.1	Klebsiella pneumoniae strain=NY9	Complete_ Genome
GCF_001956965.1	Klebsiella pneumoniae strain=825795-1	Complete_ Genome
GCF_000286435.2	Morganella morganii subsp. morganii KT KT	Complete_ Genome
GCF_001558895.1	Morganella morganii strain=FDAARGOS_172	Complete_ Genome
GCF_000069965.1	Proteus mirabilis HI4320	Complete_ Genome
GCF_000444425.1	Proteus mirabilis BB2000 strain=BB2000	Complete_ Genome
GCF_001281545.1	Proteus mirabilis strain=CYPM1	Complete_ Genome
GCF_001640985.1	Proteus mirabilis strain=AOUC-001	Complete_ Genome
GCF_001281565.1	Proteus vulgaris strain=CYPV1	Complete_ Genome
GCF_001874625.1	Providencia rettgeri strain=RB151	Complete_ Genome
GCF_000259175.1	Providencia stuartii MRSN 2154 strain=MRSN 2154	Complete_ Genome
GCF_000754345.1	Providencia stuartii strain=ATCC 33672	Complete_ Genome
GCF_001558855.1	Providencia stuartii strain=FDAARGOS_145	Complete_ Genome
GCF_001888205.1	Providencia stuartii strain=BE2467	Complete_ Genome
GCF_000422085.1	Serratia liquefaciens ATCC 27592 strain=ATCC 27592	Complete_ Genome
GCF_000975245.1	Serratia liquefaciens strain=HUMV-21	Complete_ Genome
GCF_001559135.1	Serratia liquefaciens strain=FDAARGOS_125	Complete_ Genome
GCF_000330865.1	Serratia marcescens FGI94 strain=FGI94	Complete_ Genome
GCF_000336425.1	Serratia marcescens WW4 strain=WW4	Complete_ Genome
GCF_000513215.1	Serratia marcescens subsp. marcescens Db11 strain=Db11	Complete_ Genome
GCF_000828775.1	Serratia marcescens SM39 strain=SM39	Complete_ Genome
GCF_001022215.1	Serratia marcescens strain=CAV1492	Complete_ Genome
GCF_001280365.1	Serratia marcescens strain=RSC-14	Complete_ Genome
GCF_001294565.1	Serratia marcescens strain=SmUNAM836	Complete_ Genome
GCF_001417865.1	Serratia marcescens strain=B3R3	Complete_ Genome
GCF_000012025.1	Shigella boydii Sb227 strain=Sb227	Complete_ Genome
GCF_000020185.1	Shigella boydii CDC 3083-94 strain=BS512; CDC 3083-94	Complete_ Genome
GCF_001027225.1	Shigella boydii strain=ATCC 9210	Complete_ Genome
GCF_000012005.1	Shigella dysenteriae Sd197 strain=Sd197	Complete_ Genome
GCF_000006925.2	Shigella flexneri 2a str. 301 strain=301	Complete_ Genome
GCF_000007405.1	Shigella flexneri 2a str. 2457T strain=2457T	Complete_ Genome
GCF_000013585.1	Shigella flexneri 5 str. 8401 strain=8401	Complete_ Genome
GCF_000022245.1	Shigella flexneri 2002017 strain=2002017	Complete_ Genome
GCF_000743955.1	Shigella flexneri 2003036 strain=2003036 Human	Complete_ Genome
GCF_000743995.1	Shigella flexneri Shi06HN006 strain=Shi06HN006 Human	Complete_ Genome
GCF_000953035.1	Shigella flexneri	Complete_ Genome
GCF_001021855.1	Shigella flexneri G1663 strain=G1663	Complete_ Genome
GCF_001578125.1	Shigella flexneri 1a strain=0228	Complete_ Genome
GCF_001579965.1	Shigella flexneri 4c strain=1205	Complete_ Genome
GCF_001580175.1	Shigella flexneri 2a strain=981	Complete_ Genome
GCF_000092525.1	Shigella sonnei Ss046 strain=Ss046	Complete_ Genome
GCF_000283715.1	Shigella sonnei 53G strain=53G	Complete_ Genome
GCF_001518855.1	Shigella sonnei strain=FORC_011 stool	Complete_ Genome
GCF_001558295.1	Shigella sonnei strain=FDAARGOS_90	Complete_ Genome
GCF_000953355.1	Xenorhabdus nematophila AN6/1 strain=AN6/1	Complete_ Genome
GCF_000009345.1	Yersinia enterocolitica subsp. enterocolitica 8081 strain=8081	Complete_ Genome
GCF_000192105.1	Yersinia enterocolitica subsp. palearctica 105.5R(r) strain=105.5R(r)	Complete_ Genome
GCF_000253175.1	Yersinia enterocolitica subsp. palearctica Y11 strain=Y11	Complete_ Genome
GCF_000834195.1	Yersinia enterocolitica strain=WA	Complete_ Genome
GCF_000834735.1	Yersinia enterocolitica strain=2516-87	Complete_ Genome
GCF_000968115.1	Yersinia enterocolitica (type O:5) str. YE53/03 strain=YE53/03 host faecal sample	Complete_ Genome
GCF_000987925.1	Yersinia enterocolitica strain=FORC_002	Complete_ Genome
GCF_001304755.1	Yersinia enterocolitica strain=FORC-002	Complete_ Genome
GCF_001305635.1	Yersinia enterocolitica strain=KNG22703	Complete_ Genome
GCF_001708555.1	Yersinia enterocolitica strain=YE7	Complete_ Genome
GCF_001708575.1	Yersinia enterocolitica strain=YE165	Complete_ Genome
GCF_001708595.1	Yersinia enterocolitica strain=YE6	Complete_ Genome
GCF_001708615.1	Yersinia enterocolitica strain=YE5	Complete_ Genome
GCF_001708635.1	Yersinia enterocolitica strain=YE1	Complete_ Genome
GCF_001708655.1	Yersinia enterocolitica strain=YE3	Complete_ Genome
GCF_000834515.1	Yersinia intermedia strain=Y228	Complete_ Genome
GCF_000006645.1	Yersinia pestis KIM10+	Complete_ Genome
GCF_000007885.1	Yersinia pestis biovar Microtus str. 91001 strain=91001	Complete_ Genome
GCF_000009065.1	Yersinia pestis CO92 strain=CO92	Complete_ Genome
GCF_000013805.1	Yersinia pestis Nepal516 strain=Nepal516	Complete_ Genome
GCF_000013825.1	Yersinia pestis Antiqua strain=Antiqua	Complete_ Genome
GCF_000016445.1	Yersinia pestis Pestoides F strain=Pestoides F	Complete_ Genome
GCF_000018805.1	Yersinia pestis Angola strain=Angola	Complete_ Genome
GCF_000022805.1	Yersinia pestis D106004 strain=D106004	Complete_ Genome
GCF_000022825.1	Yersinia pestis D182038 strain=D182038	Complete_ Genome
GCF_000022845.1	Yersinia pestis Z176003 strain=Z176003	Complete_ Genome
GCF_000186725.1	Yersinia pestis biovar Medievalis str. Harbin 35 strain=Harbin 35	Complete_ Genome
GCF_000222975.1	Yersinia pestis A1122 strain=A1122	Complete_ Genome
GCF_000834235.1	Yersinia pestis strain=PBM19	Complete_ Genome
GCF_000834275.1	Yersinia pestis strain=Harbin35	Complete_ Genome
GCF_000834315.1	Yersinia pestis Pestoides F strain=Pestoides F	Complete_ Genome
GCF_000834335.1	Yersinia pestis strain=Shasta	Complete_ Genome
GCF_000834495.1	Yersinia pestis strain=El Dorado	Complete_ Genome
GCF_000834755.1	Yersinia pestis A1122 strain=A1122	Complete_ Genome
GCF_000834775.1	Yersinia pestis strain=Dodson	Complete_ Genome
GCF_000834825.1	Yersinia pestis Antiqua strain=Antiqua	Complete_ Genome
GCF_000834845.1	Yersinia pestis Angola strain=Angola	Complete_ Genome
GCF_000834885.1	Yersinia pestis strain=Nicholisk 41	Complete_ Genome
GCF_000834925.1	Yersinia pestis str. Pestoides B strain=Pestoides B	Complete_ Genome
GCF_000834985.1	Yersinia pestis Pestoides G strain=Pestoides G	Complete_ Genome
GCF_001188695.1	Yersinia pestis 1412 strain=1412	Complete_ Genome
GCF_001188715.1	Yersinia pestis 1522 strain=1522	Complete_ Genome
GCF_001188755.1	Yersinia pestis 8787 strain=8787	Complete_ Genome
GCF_001188775.1	Yersinia pestis 3770 strain=3770	Complete_ Genome
GCF_001188795.1	Yersinia pestis 3067 strain=3067	Complete_ Genome
GCF_001188815.1	Yersinia pestis 2944 strain=2944	Complete_ Genome
GCF_001188935.1	Yersinia pestis 1413 strain=1413	Complete_ Genome
GCF_001293415.1	Yersinia pestis CO92 strain=CO92	Complete_ Genome
GCF_001693595.1	Yersinia pestis strain=Cadman	Complete_ Genome
GCF_000016945.1	Yersinia pseudotuberculosis IP 31758 strain=IP 31758	Complete_ Genome
GCF_000019465.1	Yersinia pseudotuberculosis YPIII strain=YPIII	Complete_ Genome
GCF_000020085.1	Yersinia pseudotuberculosis PB1/+ strain=PB1/+	Complete_ Genome
GCF_000047365.1	Yersinia pseudotuberculosis IP 32953 strain=IP 32953	Complete_ Genome
GCF_000750315.1	Yersinia pseudotuberculosis strain=ATCC 6904	Complete_ Genome
GCF_000834295.1	Yersinia pseudotuberculosis IP 32953 strain=IP32953	Complete_ Genome
GCF_000834355.1	Yersinia pseudotuberculosis strain=MD67	Complete_ Genome
GCF_000834375.1	Yersinia pseudotuberculosis YPIII strain=YPIII	Complete_ Genome
GCF_000834415.1	Yersinia pseudotuberculosis strain=EP2/+	Complete_ Genome
GCF_000834435.1	Yersinia pseudotuberculosis strain=1	Complete_ Genome
GCF_000834475.1	Yersinia pseudotuberculosis PB1/+ strain=PB1/+	Complete_ Genome
GCF_000834945.1	Yersinia pseudotuberculosis str. PA3606 strain=Pa3606	Complete_ Genome
GCF_900092345.1	Yersinia pseudotuberculosis NZYP4713	Complete_ Genome
GCF_000020865.1	Edwardsiella tarda EIB202 strain=EIB202	Complete_ Genome
GCF_000146305.1	Edwardsiella tarda FL6-60 strain=FL6-60	Complete_ Genome
GCF_001011055.1	Edwardsiella tarda strain=FL95-01	Complete_ Genome
GCF_000014805.1	Aeromonas hydrophila subsp. hydrophila ATCC 7966 strain=ATCC 7966	Complete_ Genome
GCF_000401555.1	Aeromonas hydrophila ML09-119 strain=ML09-119	Complete_ Genome
GCF_000512185.1	Aeromonas hydrophila 4AK4 strain=4AK4	Complete_ Genome
GCF_000612075.2	Aeromonas hydrophila YL17 strain=YL17	Complete_ Genome
GCF_000633175.1	Aeromonas hydrophila AL09-71 strain=AL09-71	Complete_ Genome
GCF_000635955.1	Aeromonas hydrophila pc104A strain=PC-104A	Complete_ Genome
GCF_000819505.1	Aeromonas hydrophila J-1 strain=J-1	Complete_ Genome
GCF_000940915.1	Aeromonas hydrophila strain=AL06-06 Goldfish	Complete_ Genome
GCF_000963645.1	Aeromonas hydrophila strain=AH10	Complete_ Genome
GCF_001019645.1	Aeromonas hydrophila NJ-35 strain=NJ-35	Complete_ Genome
GCF_001455365.1	Aeromonas hydrophila strain=JBN2301	Complete_ Genome
GCF_001518775.1	Aeromonas hydrophila strain=D4	Complete_ Genome
GCF_001683535.1	Aeromonas hydrophila strain=GYK1	Complete_ Genome
GCF_001687125.1	Aeromonas hydrophila strain=AHNIH1	Complete_ Genome
GCF_000196395.1	Aeromonas salmonicida subsp. salmonicida A449 strain=A449	Complete_ Genome
GCF_000287215.2	Aeromonas media WS strain=WS	Complete_ Genome
GCF_001447335.1	Aeromonas schubertii strain=WL1483	Complete_ Genome
GCF_000204115.1	Aeromonas veronii B565 strain=B565	Complete_ Genome
GCF_001593245.1	Aeromonas veronii strain=TH0426	Complete_ Genome
GCF_001634325.1	Aeromonas veronii strain=AVNIH1	Complete_ Genome
GCF_000354175.2	Vibrio alginolyticus NBRC 15630 = ATCC 17749 strain=ATCC 17749	Complete_ Genome
GCF_001469735.1	Vibrio alginolyticus strain=ATCC 33787	Complete_ Genome
GCF_001679745.1	Vibrio alginolyticus strain=ZJ-T	Complete_ Genome
GCF_000006745.1	Vibrio cholerae O1 biovar El Tor str. N16961 strain=N16961	Complete_ Genome
GCF_000016245.1	Vibrio cholerae O395 strain=O395	Complete_ Genome
GCF_000021605.1	Vibrio cholerae M66-2 strain=M66-2	Complete_ Genome
GCF_000021625.1	Vibrio cholerae O395 strain=O395	Complete_ Genome
GCF_000022585.1	Vibrio cholerae MJ-1236 strain=MJ-1236	Complete_ Genome
GCF_000166455.1	Vibrio cholerae O1 str. 2010EL-1786 strain=2010EL-1786	Complete_ Genome
GCF_000195065.1	Vibrio cholerae LMA3984-4 strain=LMA3984-4	Complete_ Genome
GCF_000250855.1	Vibrio cholerae IEC224 strain=IEC224	Complete_ Genome
GCF_000765415.1	Vibrio cholerae 2012EL-2176	Complete_ Genome
GCF_000788715.2	Vibrio cholerae strain=2012Env-9	Complete_ Genome
GCF_000829215.1	Vibrio cholerae MS6 strain=MS6	Complete_ Genome
GCF_000963555.1	Vibrio cholerae O1 biovar El Tor strain=FJ147	Complete_ Genome
GCF_000969235.1	Vibrio cholerae strain=1154-74	Complete_ Genome
GCF_000969265.1	Vibrio cholerae strain=10432-62	Complete_ Genome
GCF_001318185.1	Vibrio cholerae O1 str. KW3 strain=KW3	Complete_ Genome
GCF_001683415.1	Vibrio cholerae 2740-80 strain=2740-80	Complete_ Genome
GCF_001854425.1	Vibrio cholerae strain=Env-390	Complete_ Genome
GCF_001887395.1	Vibrio cholerae strain=C5	Complete_ Genome
GCF_001887415.1	Vibrio cholerae strain=E1320	Complete_ Genome
GCF_001887435.1	Vibrio cholerae strain=CRC711	Complete_ Genome
GCF_001887455.1	Vibrio cholerae strain=CRC1106	Complete_ Genome
GCF_001887495.1	Vibrio cholerae strain=E1162	Complete_ Genome
GCF_001887515.1	Vibrio cholerae strain=NCTC5395	Complete_ Genome
GCF_001887615.1	Vibrio cholerae strain=NCTC9420	Complete_ Genome
GCF_001887635.1	Vibrio cholerae strain=M2140	Complete_ Genome
GCF_001887655.1	Vibrio cholerae strain=E9120	Complete_ Genome
GCF_000011805.1	Vibrio fischeri ES114 strain=ES114	Complete_ Genome
GCF_000770115.1	Vibrio harveyi strain=ATCC 33843 (392 [MAV])	Complete_ Genome
GCF_001558435.1	Vibrio harveyi strain=ATCC 43516	Complete_ Genome
GCF_001908435.2	Vibrio harveyi QT520	Complete_ Genome
GCF_000196095.1	Vibrio parahaemolyticus RIMD 2210633	Complete_ Genome
GCF_000328405.1	Vibrio parahaemolyticus BB22OP strain=BB22OP	Complete_ Genome
GCF_000430405.1	Vibrio parahaemolyticus O1:Kuk str. FDA_R31 strain=FDA_R31 FDA_R31	Complete_ Genome
GCF_000430425.1	Vibrio parahaemolyticus O1:K33 str. CDC_K4557 strain=CDC_K4557 CDC_K4557	Complete_ Genome
GCF_000568495.1	Vibrio parahaemolyticus UCM-V493 strain=UCM-V493	Complete_ Genome
GCF_001244315.1	Vibrio parahaemolyticus strain=FORC_008	Complete_ Genome
GCF_001304775.1	Vibrio parahaemolyticus strain=FORC_006 cutting board	Complete_ Genome
GCF_001433415.1	Vibrio parahaemolyticus strain=FORC_004 aquarium water	Complete_ Genome
GCF_001558495.1	Vibrio parahaemolyticus strain=ATCC 17802	Complete_ Genome
GCF_001636035.1	Vibrio parahaemolyticus strain=FORC_014	Complete_ Genome
GCF_001700835.1	Vibrio parahaemolyticus strain=CHN25	Complete_ Genome
GCF_001758605.1	Vibrio parahaemolyticus strain=FORC_023 378	Complete_ Genome
GCF_001879585.1	Vibrio parahaemolyticus strain=FORC_022	Complete_ Genome
GCF_001887055.1	Vibrio parahaemolyticus strain=FORC_018	Complete_ Genome
GCF_000009745.1	Vibrio vulnificus YJ016 strain=YJ016	Complete_ Genome
GCF_000039765.1	Vibrio vulnificus CMCP6 strain=CMCP6	Complete_ Genome
GCF_000186585.1	Vibrio vulnificus MO6-24/O strain=MO6-24/O	Complete_ Genome
GCF_000746665.1	Vibrio vulnificus strain=93U204	Complete_ Genome
GCF_001433435.1	Vibrio vulnificus strain=FORC_009	Complete_ Genome
GCF_001558515.1	Vibrio vulnificus strain=ATL 6-1306	Complete_ Genome
GCF_001653775.1	Vibrio vulnificus strain=FORC_016	Complete_ Genome
GCF_001675245.1	Vibrio vulnificus strain=FORC_017	Complete_ Genome
GCF_001558255.1	Grimontia hollisae strain=ATCC 33564	Complete_ Genome
GCF_001558475.1	Vibrio mimicus strain=ATCC 33654	Complete_ Genome
GCF_001767355.1	Vibrio mimicus strain=SCCF01	Complete_ Genome
GCF_001558415.1	Vibrio fluvialis strain=ATCC 33809	Complete_ Genome
GCF_001952955.1	Vibrio fluvialis strain=12605	Complete_ Genome
GCF_000017705.1	Vibrio campbellii ATCC BAA-1116 strain=ATCC BAA-1116; BB120	Complete_ Genome
GCF_000464435.1	Vibrio campbellii ATCC BAA-1116 strain=ATCC BAA-1116	Complete_ Genome
GCF_001969325.1	Vibrio campbellii strain=LMB29	Complete_ Genome
GCF_001456255.1	Vibrio natriegens NBRC 15636 = ATCC 14048 = DSM 759 strain=ATCC 14048	Complete_ Genome
GCF_001680025.1	Vibrio natriegens NBRC 15636 = ATCC 14048 = DSM 759 strain=ATCC 14048	Complete_ Genome
GCF_001680045.1	Vibrio natriegens strain=CCUG 16371	Complete_ Genome
GCF_001680065.1	Vibrio natriegens strain=CCUG 16373	Complete_ Genome
GCF_001680085.1	Vibrio natriegens strain=CCUG 16374	Complete_ Genome
GCF_900087055.1	Plesiomonas shigelloides strain=NCTC10360	Complete_ Genome
GCF_000241025.1	Aggregatibacter actinomycetemcomitans ANH9381 strain=ANH9381	Complete_ Genome
GCF_000604045.1	Aggregatibacter actinomycetemcomitans HK1651 strain=HK1651	Complete_ Genome
GCF_001191585.1	Aggregatibacter actinomycetemcomitans HK1651 strain=HK1651	Complete_ Genome
GCF_001594245.1	Aggregatibacter actinomycetemcomitans strain=VT1169	Complete_ Genome
GCF_001594265.1	Aggregatibacter actinomycetemcomitans strain=624	Complete_ Genome
GCF_001690155.1	Aggregatibacter actinomycetemcomitans strain=IDH781	Complete_ Genome
GCF_000015885.1	Actinobacillus pleuropneumoniae serovar 5b str. L20 strain=L20	Complete_ Genome
GCF_000016685.1	Actinobacillus pleuropneumoniae serovar 3 str. JL03 strain=JL03	Complete_ Genome
GCF_000020405.1	Actinobacillus pleuropneumoniae serovar 7 str. AP76 strain=AP76	Complete_ Genome
GCF_001460855.1	Actinobacillus pleuropneumoniae serovar 8 MIDG2331	Complete_ Genome
GCF_000739435.1	Actinobacillus suis ATCC 33415 strain=ATCC 33415	Complete_ Genome
GCF_000801145.1	Actinobacillus equuli subsp. equuli strain=19392	Complete_ Genome
GCF_000012185.1	Haemophilus influenzae 86-028NP strain=86-028NP	Complete_ Genome
GCF_000016465.1	Haemophilus influenzae PittEE strain=PittEE	Complete_ Genome
GCF_000027305.1	Haemophilus influenzae Rd KW20	Complete_ Genome
GCF_000165525.1	Haemophilus influenzae R2866 strain=R2866	Complete_ Genome
GCF_000165575.1	Haemophilus influenzae R2846 strain=R2846	Complete_ Genome
GCF_000197875.1	Haemophilus influenzae F3031 strain=F3031	Complete_ Genome
GCF_000200475.1	Haemophilus influenzae F3047 strain=F3047	Complete_ Genome
GCF_000210875.1	Haemophilus influenzae 10810 strain=10810	Complete_ Genome
GCF_000465255.1	Haemophilus influenzae KR494 strain=KR494 necrotizing myositis	Complete_ Genome
GCF_000698365.1	Haemophilus influenzae CGSHiCZ412602 strain=CGSHiCZ412602	Complete_ Genome
GCF_000767075.1	Haemophilus influenzae Hi375	Complete_ Genome
GCF_000931575.1	Haemophilus influenzae strain=477	Complete_ Genome
GCF_000931605.1	Haemophilus influenzae strain=C486	Complete_ Genome
GCF_000931625.1	Haemophilus influenzae strain=723	Complete_ Genome
GCF_000968335.1	Haemophilus influenzae 2019 strain=2019	Complete_ Genome
GCF_001457655.1	Haemophilus influenzae strain=NCTC8143; NCTC8143	Complete_ Genome
GCF_001856725.1	Haemophilus influenzae strain=NML-Hia-1	Complete_ Genome
GCF_000210895.1	Haemophilus parainfluenzae T3T1 strain=T3T1	Complete_ Genome
GCF_000007945.1	Haemophilus ducreyi 35000HP strain=35000HP	Complete_ Genome
GCF_001647655.1	[Haemophilus] ducreyi strain=VAN1	Complete_ Genome
GCF_001647695.1	[Haemophilus] ducreyi strain=VAN2	Complete_ Genome
GCF_001647735.1	[Haemophilus] ducreyi strain=VAN3	Complete_ Genome
GCF_001647765.1	[Haemophilus] ducreyi strain=VAN4	Complete_ Genome
GCF_001647795.1	[Haemophilus] ducreyi strain=VAN5	Complete_ Genome
GCF_001647815.1	[Haemophilus] ducreyi strain=GHA1	Complete_ Genome
GCF_001647835.1	[Haemophilus] ducreyi strain=GHA2	Complete_ Genome
GCF_001647855.1	[Haemophilus] ducreyi strain=GHA3	Complete_ Genome
GCF_001647875.1	[Haemophilus] ducreyi strain=GHA5	Complete_ Genome
GCF_001647895.1	[Haemophilus] ducreyi strain=GHA8	Complete_ Genome
GCF_001647915.1	[Haemophilus] ducreyi strain=GHA9	Complete_ Genome
GCF_000011785.1	Haemophilus somnus 129PT strain=129PT	Complete_ Genome
GCF_000019405.1	Haemophilus somnus 2336 strain=2336	Complete_ Genome
GCF_000022985.1	Aggregatibacter aphrophilus NJ8700 strain=NJ8700	Complete_ Genome
GCF_001188835.1	Aggregatibacter aphrophilus NJ8700 strain=NJ8700	Complete_ Genome
GCF_001262035.1	Aggregatibacter aphrophilus strain=W10433	Complete_ Genome
GCF_000021885.1	Haemophilus parasuis SH0165 strain=SH0165	Complete_ Genome
GCF_000740985.1	[Haemophilus] parasuis strain=SH03	Complete_ Genome
GCF_000742795.1	[Haemophilus] parasuis strain=KL0318	Complete_ Genome
GCF_001611775.1	[Haemophilus] parasuis strain=SC1401	Complete_ Genome
GCF_000006825.1	Pasteurella multocida subsp. multocida str. Pm70 strain=Pm70	Complete_ Genome
GCF_000234745.1	Pasteurella multocida 36950 strain=36950	Complete_ Genome
GCF_000255915.1	Pasteurella multocida subsp. multocida str. HN06 strain=HN06	Complete_ Genome
GCF_000259545.1	Pasteurella multocida subsp. multocida str. 3480 strain=3480	Complete_ Genome
GCF_000512395.1	Pasteurella multocida subsp. multocida str. HB03 strain=HB03	Complete_ Genome
GCF_000754275.1	Pasteurella multocida strain=ATCC 43137	Complete_ Genome
GCF_000973525.1	Pasteurella multocida subsp. multocida OH4807 strain=OH4807	Complete_ Genome
GCF_000973565.1	Pasteurella multocida OH1905 strain=OH1905	Complete_ Genome
GCF_001578435.1	Pasteurella multocida subsp. multocida PMTB2.1 strain=PMTB2.1	Complete_ Genome
GCF_001663095.1	Pasteurella multocida subsp. multocida HB01 strain=HB01	Complete_ Genome
GCF_001721885.1	Pasteurella multocida strain=Pm-3	Complete_ Genome
GCF_001874445.1	Pasteurella multocida strain=Razi_Pm0001	Complete_ Genome
GCF_001956795.1	Pasteurella multocida subsp. multocida str. HN07 strain=HN07	Complete_ Genome
GCF_000209675.1	Gallibacterium anatis UMN179 strain=UMN179	Complete_ Genome
GCF_000024505.1	Anaplasma centrale str. Israel strain=Israel	Complete_ Genome
GCF_000011945.1	Anaplasma marginale str. St. Maries strain=St. Maries	Complete_ Genome
GCF_000020305.1	Anaplasma marginale str. Florida strain=Florida	Complete_ Genome
GCF_000015445.1	Bartonella bacilliformis KC583 strain=KC583; ATCC 35685	Complete_ Genome
GCF_001559035.1	Bartonella bacilliformis strain=ATCC 35685D-5; KC583	Complete_ Genome
GCF_000007765.1	Coxiella burnetii RSA 493 strain=RSA 493	Complete_ Genome
GCF_000017105.1	Coxiella burnetii Dugway 5J108-111 strain=Dugway 5J108-111	Complete_ Genome
GCF_000018745.1	Coxiella burnetii RSA 331 strain=RSA 331	Complete_ Genome
GCF_000019865.1	Coxiella burnetii CbuG_Q212 strain=CbuG_Q212	Complete_ Genome
GCF_000019885.1	Coxiella burnetii CbuK_Q154 strain=CbuK_Q154	Complete_ Genome
GCF_000168875.3	Coxiella burnetii 'MSU Goat Q177' strain=MSU Goat Q177	Complete_ Genome
GCF_000367725.2	Coxiella burnetii Z3055 strain=Z3055	Complete_ Genome
GCF_001572745.1	Coxiella burnetii strain=3262	Complete_ Genome
GCF_000026005.1	Ehrlichia ruminantium str. Welgevonden strain=Welgevonden	Complete_ Genome
GCF_000050405.1	Ehrlichia ruminantium str. Gardel strain=Gardel	Complete_ Genome
GCF_000050425.1	Ehrlichia ruminantium str. Welgevonden strain=Welgevonden	Complete_ Genome
GCF_000007025.1	Rickettsia conorii str. Malish 7 strain=Malish 7	Complete_ Genome
GCF_000022785.1	Rickettsia prowazekii str. Rp22 strain=Rp22	Complete_ Genome
GCF_000195735.1	Rickettsia prowazekii str. Madrid E strain=Madrid E	Complete_ Genome
GCF_000277165.1	Rickettsia prowazekii str. Chernikova strain=Chernikova	Complete_ Genome
GCF_000277185.1	Rickettsia prowazekii str. Katsinyian strain=Katsinyian	Complete_ Genome
GCF_000277205.1	Rickettsia prowazekii str. BuV67-CWPP strain=BuV67-CWPP	Complete_ Genome
GCF_000277245.1	Rickettsia prowazekii str. GvV257 strain=GvV257	Complete_ Genome
GCF_000277265.1	Rickettsia prowazekii str. RpGvF24 strain=RpGvF24	Complete_ Genome
GCF_000363905.1	Rickettsia prowazekii str. NMRC Madrid E strain=NMRC Madrid E	Complete_ Genome
GCF_000367405.1	Rickettsia prowazekii str. Breinl strain=Breinl	Complete_ Genome
GCF_001602215.1	Rickettsia prowazekii strain=Naples-1	Complete_ Genome
GCF_000017445.4	Rickettsia rickettsii str. Iowa strain=Iowa	Complete_ Genome
GCF_000018225.1	Rickettsia rickettsii str. 'Sheila Smith' strain=Sheila Smith	Complete_ Genome
GCF_000283775.1	Rickettsia rickettsii str. Colombia strain=Colombia	Complete_ Genome
GCF_000283795.1	Rickettsia rickettsii str. Arizona strain=Arizona	Complete_ Genome
GCF_000283815.1	Rickettsia rickettsii str. Hino strain=Hino	Complete_ Genome
GCF_000283935.1	Rickettsia rickettsii str. Hlp#2 strain=Hlp#2	Complete_ Genome
GCF_000283955.1	Rickettsia rickettsii str. Brazil strain=Brazil	Complete_ Genome
GCF_000831525.1	Rickettsia rickettsii str. R strain=R	Complete_ Genome
GCF_000831545.1	Rickettsia rickettsii str. Morgan strain=Morgan	Complete_ Genome
GCF_001950995.1	Rickettsia rickettsii strain=Iowa Large Clone	Complete_ Genome
GCF_001951015.1	Rickettsia rickettsii strain=Iowa Small Clone	Complete_ Genome
GCF_000010205.1	Orientia tsutsugamushi str. Ikeda strain=Ikeda	Complete_ Genome
GCF_000063545.1	Orientia tsutsugamushi str. Boryong strain=Boryong	Complete_ Genome
GCF_000008045.1	Rickettsia typhi str. Wilmington strain=Wilmington	Complete_ Genome
GCF_000277285.1	Rickettsia typhi str. TH1527 strain=TH1527	Complete_ Genome
GCF_000277305.1	Rickettsia typhi str. B9991CWPP strain=B9991CWPP	Complete_ Genome
GCF_000018205.1	Rickettsia akari str. Hartford strain=Hartford	Complete_ Genome
GCF_000284155.1	Rickettsia australis str. Cutlack strain=Cutlack	Complete_ Genome
GCF_000014345.1	Rickettsia canadensis str. McKiel strain=McKiel	Complete_ Genome
GCF_000283915.1	Rickettsia canadensis str. CA410 strain=CA410	Complete_ Genome
GCF_000046685.1	Bartonella quintana str. Toulouse strain=Toulouse	Complete_ Genome
GCF_000294715.1	Bartonella quintana RM-11 strain=RM-11	Complete_ Genome
GCF_000008725.1	Chlamydia trachomatis D/UW-3/CX strain=D/UW-3/CX	Complete_ Genome
GCF_000012125.1	Chlamydia trachomatis A/HAR-13 strain=A/HAR-13	Complete_ Genome
GCF_000026905.1	Chlamydia trachomatis B/TZ1A828/OT strain=B/TZ1A828/OT	Complete_ Genome
GCF_000026925.1	Chlamydia trachomatis B/Jali20/OT strain=Jali20	Complete_ Genome
GCF_000068525.2	Chlamydia trachomatis L2b/UCH-1/proctitis	Complete_ Genome
GCF_000068585.1	Chlamydia trachomatis 434/Bu strain=434/Bu	Complete_ Genome
GCF_000092485.1	Chlamydia trachomatis D-EC strain=D-EC	Complete_ Genome
GCF_000092665.1	Chlamydia trachomatis E/150 strain=E/150	Complete_ Genome
GCF_000092685.1	Chlamydia trachomatis G/9768 strain=G/9768	Complete_ Genome
GCF_000092705.1	Chlamydia trachomatis G/11222 strain=G/11222	Complete_ Genome
GCF_000092725.1	Chlamydia trachomatis G/11074 strain=G/11074	Complete_ Genome
GCF_000092745.1	Chlamydia trachomatis E/11023 strain=E/11023	Complete_ Genome
GCF_000092805.1	Chlamydia trachomatis G/9301 strain=G/9301	Complete_ Genome
GCF_000093005.1	Chlamydia trachomatis D-LC strain=D-LC	Complete_ Genome
GCF_000210495.1	Chlamydia trachomatis Sweden2 strain=Sweden2	Complete_ Genome
GCF_000220105.1	Chlamydia trachomatis L2c strain=L2c	Complete_ Genome
GCF_000226605.1	Chlamydia trachomatis A2497 strain=A2497	Complete_ Genome
GCF_000284475.1	Chlamydia trachomatis A2497 strain=A2497	Complete_ Genome
GCF_000304495.1	Chlamydia trachomatis E/SW3 strain=E/SW3	Complete_ Genome
GCF_000304515.1	Chlamydia trachomatis F/SW4 strain=F/SW4	Complete_ Genome
GCF_000304535.1	Chlamydia trachomatis F/SW5 strain=F/SW5	Complete_ Genome
GCF_000318525.1	Chlamydia trachomatis A/363 strain=A/363	Complete_ Genome
GCF_000318565.1	Chlamydia trachomatis A/7249 strain=A/7249	Complete_ Genome
GCF_000318645.1	Chlamydia trachomatis E/Bour strain=E/Bour	Complete_ Genome
GCF_000318765.1	Chlamydia trachomatis Ia/SotonIa1 strain=Ia/SotonIa1	Complete_ Genome
GCF_000318785.1	Chlamydia trachomatis Ia/SotonIa3 strain=Ia/SotonIa3	Complete_ Genome
GCF_000318825.1	Chlamydia trachomatis L1/440/LN strain=L1/440/LN	Complete_ Genome
GCF_000318845.1	Chlamydia trachomatis L1/115 strain=L1/115	Complete_ Genome
GCF_000318865.1	Chlamydia trachomatis L1/224 strain=L1/224	Complete_ Genome
GCF_000318885.1	Chlamydia trachomatis L2/25667R	Complete_ Genome
GCF_000318905.1	Chlamydia trachomatis L2b/8200/07 strain=L2b/8200/07	Complete_ Genome
GCF_000318925.1	Chlamydia trachomatis L2b/UCH-2 strain=L2b/UCH-2	Complete_ Genome
GCF_000318985.1	Chlamydia trachomatis L2b/795	Complete_ Genome
GCF_000319105.1	Chlamydia trachomatis L3/404/LN strain=L3/404/LN	Complete_ Genome
GCF_000364765.1	Chlamydia trachomatis L2/434/Bu(i) strain=L2/434/Bu(i)	Complete_ Genome
GCF_000364785.1	Chlamydia trachomatis L2/434/Bu(f) strain=L2/434/Bu(f)	Complete_ Genome
GCF_000441585.1	Chlamydia trachomatis RC-F/69 strain=RC-F/69	Complete_ Genome
GCF_000441615.1	Chlamydia trachomatis RC-L2(s)/46 strain=RC-L2(s)/46	Complete_ Genome
GCF_000441635.1	Chlamydia trachomatis RC-F(s)/852 strain=RC-F(s)/852	Complete_ Genome
GCF_000441655.1	Chlamydia trachomatis RC-J/943 strain=RC-J/943	Complete_ Genome
GCF_000441675.1	Chlamydia trachomatis RC-J/953 strain=RC-J/953	Complete_ Genome
GCF_000441695.1	Chlamydia trachomatis RC-L2(s)/3 strain=RC-L2(s)/3	Complete_ Genome
GCF_000441715.1	Chlamydia trachomatis RC-F(s)/342 strain=RC-F(s)/342	Complete_ Genome
GCF_000441735.1	Chlamydia trachomatis RC-J(s)/122 strain=RC-J(s)/122	Complete_ Genome
GCF_000441755.1	Chlamydia trachomatis RC-J/966 strain=RC-J/966	Complete_ Genome
GCF_000441775.1	Chlamydia trachomatis J/6276tet1 strain=J/6276tet1	Complete_ Genome
GCF_000441795.1	Chlamydia trachomatis RC-J/971 strain=RC-J/971	Complete_ Genome
GCF_000441815.1	Chlamydia trachomatis RC-L2/55 strain=RC-L2/55	Complete_ Genome
GCF_000507225.1	Chlamydia trachomatis C/TW-3 strain=C/TW-3	Complete_ Genome
GCF_000590575.1	Chlamydia trachomatis	Complete_ Genome
GCF_000590615.1	Chlamydia trachomatis	Complete_ Genome
GCF_000590635.1	Chlamydia trachomatis F/11-96 strain=F/11-96	Complete_ Genome
GCF_000590675.1	Chlamydia trachomatis	Complete_ Genome
GCF_000590755.1	Chlamydia trachomatis	Complete_ Genome
GCF_000971705.1	Chlamydia trachomatis strain=L2b/CS19/08	Complete_ Genome
GCF_000971725.1	Chlamydia trachomatis strain=L2b/CS784/08	Complete_ Genome
GCF_001183765.1	Chlamydia trachomatis D/CS637/11 strain=D/CS637/11	Complete_ Genome
GCF_001183805.1	Chlamydia trachomatis strain=E/CS1025/11	Complete_ Genome
GCF_001183825.1	Chlamydia trachomatis strain=F/CS847/08	Complete_ Genome
GCF_001183845.1	Chlamydia trachomatis strain=Ia/CS190/96	Complete_ Genome
[truncated: 4,656 more rows]
